# Supplementary material for: Investigation of Protein and Epitope Characteristics of Oats and Its Implications for Celiac Disease
Source: Frontiers journal article supplement (doi:10.3389/fnut.2021.702352), 2021-09-29
Supplement: Data_Sheet_1.PDF [file Data_Sheet_1.PDF]

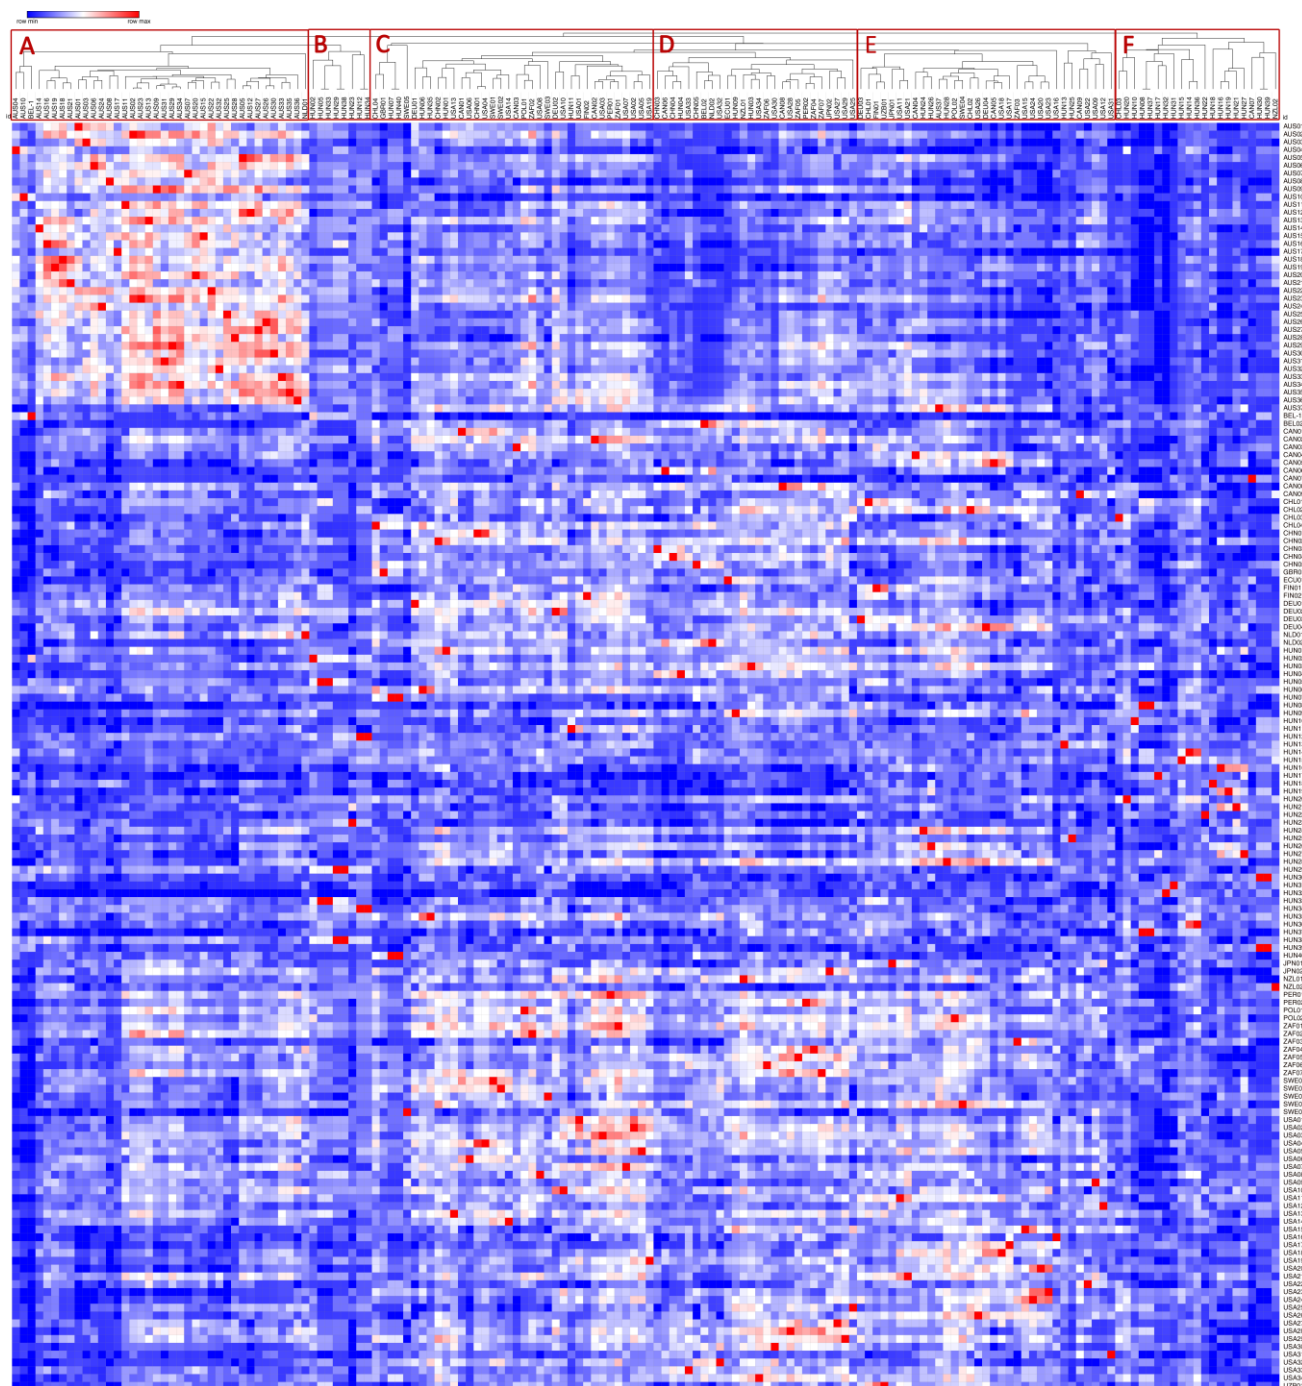

**Supplementary Figure 1.** Six clusters were defined by cluster analysis (A-F) based on the presence/absence of peaks in the RP-HPLC profiles of avenin proteins.

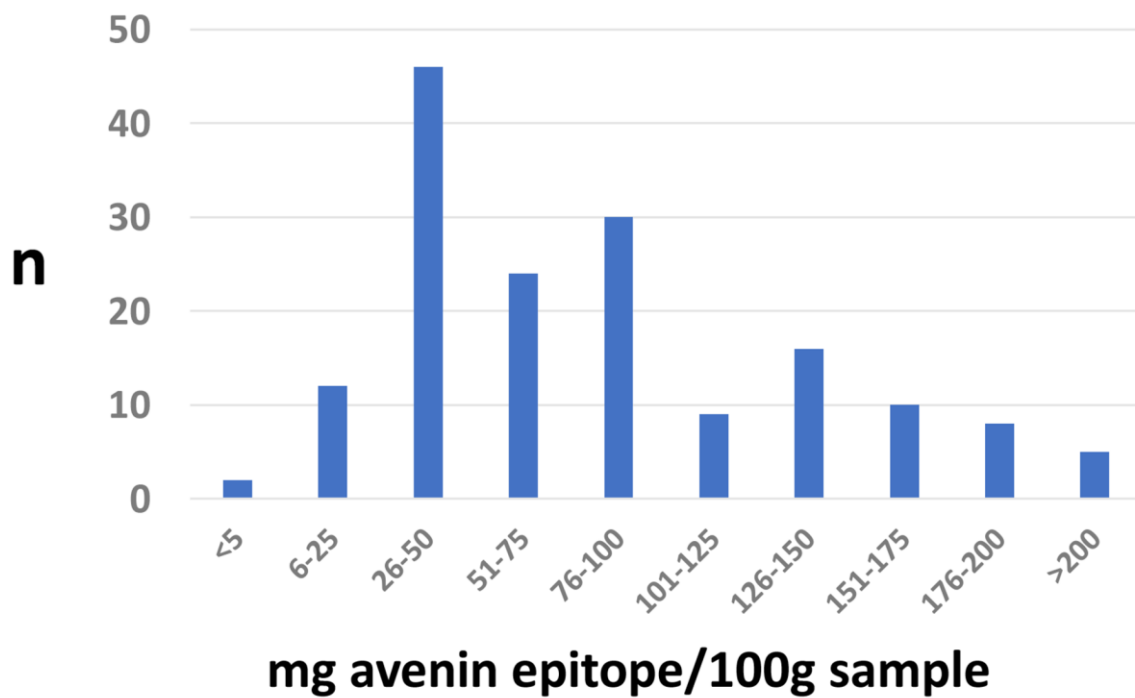

**Supplementary Figure 2.** Distribution of avenin epitope levels [mg/100g sample] among the sample population.
