# Supplementary material for: Investigation of Protein and Epitope Characteristics of Oats and Its Implications for Celiac Disease
Source: Front Nutr. 2021 Sep 29;8:702352. doi: 10.3389/fnut.2021.702352 (PMC8511309; doi:10.3389/fnut.2021.702352)
Supplement: Supplementary file 3 [file Table_3.XLSX]

## Sheet: Munka1
Supplementary Table 3
Number of peaks and composition* of avenin proteins of oats samples as the percentage of the total avenin fraction based on RP-HPLC separation.
Sample code	Origin code	Cluster code	Number of peaks in the sample	Retention time [min]**:	25.750	27.000	27.250	27.500	27.800	28.000	28.257	28.655	28.781	29.090	29.322	29.670	29.859	30.115	30.427	30.642	30.846	31.085	31.400	31.607	31.857	32.109	32.341	32.617	32.823	33.000	33.369	33.639	33.750	34.500	35.000	35.250	36.000	36.250	36.500	36.830	37.250	37.616	37.750	38.089	38.250	38.658	38.825	39.000	39.250
AUS01	R1	A	7						13.03				22.70																				9.89						2.99
AUS02	R1	A	8						4.89				26.10					13.24
AUS03	R1	A	7			13.76							23.76																				10.03						1.92
AUS04	R1	A	10					10.10		14.36			9.42										17.02
AUS05	R1	A	8			11.25					16.49											17.80
AUS06	R1	A	9			14.71					15.01																						10.06						3.87
AUS07	R1	A	11						10.65				13.59					3.01							5.79						7.95																		8.58
AUS08	R1	A	11						8.78				13.79					13.93															0.34						7.47			2.30
AUS09	R1	A	8						9.03		11.56							18.58
AUS10	R1	A	7							26.65							16.34
AUS11	R1	A	8						8.58									19.86				24.38
AUS12	R1	A	7								29.15											20.60
AUS13	R1	A	8										27.01					13.60
AUS14	R1	A	8											28.93					14.68
AUS15	R1	A	9						13.67				12.82					18.10
AUS16	R1	A	9						9.30				18.10					8.45							11.07
AUS17	R1	A	8										35.13																							11.76				3.09
AUS18	R1	A	9						10.93				25.53										18.57
AUS19	R1	A	8						11.48				22.32									19.53
AUS20	R1	A	10						8.87				13.08					14.98							3.38
AUS21	R1	A	8						7.98					20.50								17.80
AUS22	R1	A	10										13.89					20.99															9.82						4.43
AUS23	R1	A	7										24.71					18.33
AUS24	R1	A	11			5.44							17.33									10.82							0.78				10.98						4.65
AUS25	R1	A	8						9.62		11.93								19.84
AUS26	R1	A	9						7.64		23.57											23.25
AUS27	R1	A	9						3.87			27.34											12.75
AUS28	R1	A	8						10.93		13.22							17.83
AUS29	R1	A	8								26.25							16.39
AUS30	R1	A	8						7.39		23.00											20.71
AUS31	R1	A	9			8.75					12.25							14.94																											0.89
AUS32	R1	A	11			24.14												10.57							9.91														4.10			0.65							6.78
AUS33	R1	A	6										31.43									20.74
AUS34	R1	A	8								27.38							13.27
AUS35	R1	A	6								30.92											17.03
AUS36	R1	A	8								34.79											11.96
AUS37	R1	E	10											6.75		5.69				7.66		25.59
NZL01	R1	D	10														11.81		14.26		14.88		19.38
NZL02	R1	F	9					7.15				4.32		6.53						29.98
BEL01	R2	A	11										9.43							18.16							20.20												6.98				1.29		7.87
BEL02	R2	D	8												16.98			30.17
GBR01	R2	C	8																	24.95										21.72											7.54					0.88			11.32
DEU01	R2	C	9											9.78								20.44						18.12												7.74						9.10
DEU02	R2	C	8											15.41		23.68						17.53
DEU03	R2	E	6											35.28															11.89
DEU04	R2	E	7									21.02								27.12						22.49												6.56						11.31
NLD01	R2	A	9								14.99		23.09					18.13																												3.71
NLD02	R2	D	8						10.86						14.83			24.49																														5.86
POL01	R2	C	8													8.06		4.50						18.03				18.67
POL02	R2	E	8											8.55				3.84				17.42			19.16
CAN01	R3	C	8								16.68							4.16		19.66
CAN02	R3	C	9					6.90			8.35				16.03					16.76
CAN03	R3	C	12										14.94					8.21		19.24								3.96											0.99						1.58
CAN04	R3	E	9											7.17				15.66		9.77						15.91
CAN05	R3	E	6				20.91								39.20																															3.29
CAN06	R3	D	9				11.80				5.11			13.89				11.80																	0.28						0.45
CAN07	R3	F	9					5.60				6.40			16.93					15.48																										1.10
CAN08	R3	C	9								15.67									27.52					15.22							6.51								6.71		9.87
CAN09	R3	E	13								15.18			3.65						19.51		11.07				9.55												2.78				0.22			2.82
USA01	R3	C	13													3.20		13.48				5.11		17.57							19.89										6.42					0.59			9.36
USA02	R3	C	7													31.20						9.64		27.15
USA03	R3	C	6										9.41							36.12
USA04	R3	C	9															17.45		22.45						23.08
USA05	R3	C	7															32.68						19.02
USA06	R3	C	8											17.04		16.02						18.67
USA07	R3	C	6								25.56									43.40
USA08	R3	C	7					2.53				9.58		15.93						25.93
USA09	R3	E	8										14.44					4.81								29.17
USA10	R3	C	10														15.00	13.00			16.54		8.25
USA11	R3	E	12			1.49					6.67			13.06		4.62		6.46		6.36		9.33
USA12	R3	E	7		0.44		13.73							19.53				7.70																												5.36
USA13	R3	C	11													0.18		16.00			5.93			12.61		20.27
USA14	R3	C	10												13.49		10.13			12.31			22.85
USA15	R3	E	9					7.15			3.44		4.83							30.72																													0.81
USA16	R3	E	7								14.11					3.80								29.94
USA17	R3	E	12								15.46			2.68			6.20	11.95				11.14
USA18	R3	E	11						0.71		11.26					8.33			23.06																											10.33
USA19	R3	C	10								7.96				1.33				24.41			10.66																								7.27
USA20	R3	E	17														14.25	0.98		2.19			10.19		5.87		6.46		15.64
USA21	R3	E	23							6.38					3.72			0.72		9.88		6.89					19.00			8.94								2.16	0.71		9.24			2.88				7.50
USA22	R3	E	11					1.95												13.21			22.74	6.42
USA23	R3	E	17								2.56	0.14	0.20		17.46		2.84			7.64				13.70
USA24	R3	E	8														13.25			9.74						30.94
USA25	R3	D	9										8.86			4.52					14.76		22.58																								0.85
USA26	R3	E	9										9.64				4.53					14.90		23.41
USA27	R3	D	9														11.48				23.24					4.18	14.54
USA28	R3	D	20					2.69			2.59				4.33			8.14		4.18			9.25	6.10		11.11
USA29	R3	D	9														14.07			10.01		12.37				21.73
USA30	R3	D	10					2.21					3.32						4.68					20.92		13.61
USA31	R3	E	9														10.44			6.78		17.71						18.39
USA32	R3	D	9											7.16					3.75			14.49				23.56
USA33	R3	D	18																5.63			9.36		3.61					12.91			1.13							4.26			8.58			5.42		2.73		6.51
USA34	R3	D	9											7.72			4.18					14.66				22.03
CHL01	R4	E	10										0.28			15.99				6.36		10.14				21.09
CHL02	R4	E	8											30.05								31.73
CHL03	R4	F	10															19.18					13.18		22.68
CHL04	R4	F	11									12.00					14.25						1.24			13.51																				10.10
EQU01	R4	D	11									13.17								23.47								23.58															8.17	1.27	9.68	1.59
PER01	R4	C	8									19.34															15.43		9.70
PER02	R4	D	11													0.30		21.72			4.70			6.38		21.39
CHN01	R5	C	17														7.44	0.38		2.17			10.48		6.88		5.70		16.89
CHN02	R5	C	10													11.42	11.42			10.99			23.71
CHN03	R5	D	15					1.57						13.00		7.00		3.52		7.56			5.51	7.60
CHN04	R5	D	7								15.33					3.29								30.81
CHN05	R5	D	10															18.17					10.45		21.55
JPN01	R5	E	11									12.39					14.23						1.24			15.39																				10.06
JPN02	R5	D	9					7.25			3.14		4.70							34.31																													0.91
FIN01	R6	E	9															39.11										16.48											4.57						7.79
FIN02	R6	C	7				11.58				2.68				13.60			19.72
SWE01	R6	C	10											17.74				8.70		13.05		24.17
SWE02	R6	C	13						6.29			3.81			14.41				8.37	8.35			7.67	14.55
SWE03	R6	C	9												20.49			9.85		12.58		23.85
SWE04	R6	C	11								11.99							25.69								10.70											3.35						5.78						4.34
SWE05	R6	E	8													12.49		11.89		28.92
HUN01	R7	C	8															29.65				34.04
HUN02	R7	B	9													10.47		9.89		12.56		24.07
HUN03	R7	D	6															12.51		23.35
HUN04	R7	D	8							10.23			15.08					20.15				22.45
HUN05	R7	B	7								15.32							25.35																															12.83
HUN06	R7	C	10							10.85	6.03			20.18				17.15																												0.94
HUN07	R7	C	11					4.78				21.90						8.98				13.06														3.69					4.85
HUN08	R7	F	8								14.20		19.96					26.03
HUN09	R7	D	11										4.07			16.17				14.57		6.28		14.58															0.26						0.24
HUN10	R7	F	7										6.39			4.16				18.06					19.14
HUN11	R7	C	7									17.37								26.60
HUN12	R7	B	10											8.76				4.39				19.14			19.40
HUN13	R7	E	8									3.46			24.25					16.32		8.47
HUN14	R7	F	8								7.21				20.16							33.75
HUN15	R7	F	9								7.69				13.93			14.37				19.44
HUN16	R7	F	7												28.12			20.61				24.39
HUN17	R7	F	12										4.98		7.77			7.92		20.44								6.90											1.91						2.39
HUN18	R7	F	9												4.18			18.48				10.00			22.90
HUN19	R7	F	7										13.51							25.78							20.73												6.39							8.91
HUN20	R7	F	8												16.61							18.69
HUN21	R7	F	8															17.93		15.34					30.25
HUN22	R7	F	11												7.14			16.04				8.85					17.09
HUN23	R7	B	9												15.25					3.54		11.94				18.23
HUN24	R7	E	8															20.56				11.39		20.34
HUN25	R7	E	12											1.89				13.02		22.73								8.03						4.73					3.42							4.24
HUN26	R7	E	10										12.64			21.09		10.16
HUN27	R7	F	11										12.36			35.27						22.13											0.32												0.55
HUN28	R7	E	8											16.68				11.72				19.54
HUN29	R7	B	10									16.23						22.47							20.04												7.43				0.56			9.04
HUN30	R7	F	10											31.66								13.65			2.74												0.53							0.56
HUN31	R7	F	8							6.72				21.27								30.93
HUN32	R7	F	13								2.03			10.17	19.03							8.32			12.46												2.42							2.53
HUN33	R7	B	7				0.88								32.10							15.50
HUN34	R7	B	9															15.00				20.82			16.14
HUN35	R7	C	7							14.89								22.19																															8.90
HUN36	R7	F	7												18.38					13.18		19.72
HUN37	R7	F	8												18.34			13.39				19.21
HUN38	R7	B	8								8.93			4.11				17.16				19.03
HUN39	R7	F	7											24.21				12.07				23.30
HUN40	R7	C	7							29.40								16.77
ZAF01	R8	C	7								33.50							19.77
ZAF02	R8	C	8								27.97							28.89
ZAF03	R8	E	8				1.04					38.45						15.99
ZAF04	R8	D	8						14.19					22.82																																	11.29
ZAF05	R8	D	7									21.10				10.28				20.76
ZAF06	R8	D	12						4.24			13.73		9.94				10.97							9.94											2.63					3.48
ZAF07	R8	D	11					5.32			14.29			13.75				14.26												5.18
UZB01	R8	E	14													8.76		8.67				5.61		17.67							13.44										4.41								6.48
* Data shown are the averages of 6 replicate analysis
** Retention time values shown here are the mean values determined from each replicated data of the given peak in the whole dataset
[truncated: 31 more columns]
