# Supplementary material for: Investigation of Protein and Epitope Characteristics of Oats and Its Implications for Celiac Disease
Source: Frontiers journal article supplement (doi:10.3389/fnut.2021.702352), 2021-09-29
Supplement: Table_2.xlsx [file Table_2.xlsx]

## Sheet: Munka1
Supplementary Table 2
The distribution (as percentage of the total protein content) of oats samples based on the size-dependent SE-HPLC separation (shown in Figure 1)
Sample code	Origin code	P1	P2	P3	P4	P5	P6	P7		Polymers			AVENINs			Monomer globulins
										ΣP(1…5)			P6
		g/100g total protein								mean	stdev	cv	mean	stdev	cv	mean	stdev	cv
AUS01	1	28.9301	38.7376	5.4468	3.4088	2.9441	15.9755	4.5571		79.4674	1.83781	0.0231266	15.9755	0.472015	0.0295462	4.5571	0.1234	0.0270787
AUS02	1	18.051	39.4302	7.4178	3.3184	4.5273	20.5297	6.7256		72.7447	0.604667	0.00831218	20.5297	0.316457	0.0154146	6.7256	0.087315	0.0129825
AUS03	1	22.0133	39.7688	5.2892	3.4195	3.4665	19.5019	6.5408		73.9573	6.6928	0.0904955	19.5019	1.12759	0.0578195	6.5408	0.505749	0.0773221
AUS04	1	26.9197	35.6524	4.8828	3.1762	5.5515	17.8281	5.9893		76.1826	2.62319	0.034433	17.8281	1.53528	0.0861157	5.9893	1.26411	0.211061
AUS05	1	27.6565	34.48	7.0814	8.3099	6.4963	8.86	6.7098		84.0241	0.833602	0.00992099	8.86	0.136573	0.0154146	7.12	0.179433	0.0252013
AUS06	1	29.6295	34.4996	6.0929	2.836	5.7294	15.6525	5.5601		78.7874	4.54906	0.0577384	15.6525	1.52926	0.0977006	5.5601	0.161352	0.0290197
AUS07	1	18.7086	44.158	6.7064	2.7347	5.1484	17.3976	5.1463		77.4561	1.68226	0.0217189	17.3976	0.402275	0.0231224	5.1463	0.0913749	0.0177555
AUS08	1	28.0437	29.77	8.7111	4.11	5.7018	17.4091	6.2553		76.3366	15.7045	0.205726	17.4091	2.08215	0.119601	6.2553	1.81407	0.290006
AUS09	1	24.494	32.9485	4.4554	4.8367	6.6109	20.8313	5.8231		73.3455	4.86746	0.0663634	20.8313	1.20446	0.0578195	5.8231	0.466931	0.0801859
AUS10	1	21.36	36.0146	9.86	4.71	1.9419	19.0797	7.0344		73.8865	0.118869	0.00160881	19.0797	0.147051	0.00770718	7.0344	0.060435	0.00859135
AUS11	1	21.8274	24.88	9.3982	5.54	5.0232	25.39	7.9416		66.6688	6.27456	0.0941153	25.39	2.6441	0.104139	7.9416	0.63453	0.0798995
AUS12	1	26.47	31.22	8.12	4	2.017	21.2179	6.9541		71.827	0.849015	0.0118203	21.2179	0.626908	0.0295462	6.9541	0.458046	0.065867
AUS13	1	21.6332	37.336	5.4542	3.1134	4.2647	21.124	7.0743		71.8015	0.866362	0.0120661	21.124	1.22138	0.0578195	7.0743	0.232981	0.0329335
AUS14	1	27.364	28.14	4.27	3.1048	3.2481	27.72	6.1515		66.1269	1.06386	0.0160881	27.72	0.569732	0.0205531	6.1515	0.140932	0.0229103
AUS15	1	24.9518	36.1651	5.1431	4.3914	6.0674	16.972	6.3092		76.7188	0.229709	0.00299417	16.972	0.0436019	0.00256905	6.3092	0.00642424	0.00101823
AUS16	1	27.8463	35.68	6.11	4.92	3.9771	15.7628	5.7031		78.5334	1.03182	0.0131386	15.7628	0.992461	0.0629622	5.7031	0.0177842	0.00311834
AUS17	1	22.7832	37.9383	5.11	0.2614	2.5725	24.837	6.5		68.6654	4.54766	0.0662293	24.837	1.2445	0.0501068	6.5	0.39525	0.0608076
AUS18	1	23.4974	38.1768	4.8107	3.3255	5.4296	17.8202	6.9397		75.24	1.99727	0.0265454	17.8202	1.51167	0.0848289	6.9397	0.56839	0.0819042
AUS19	1	17.0791	47.7973	5.9802	3.018	5.2726	16.7701	4.0826		79.1472	8.55252	0.108058	16.7701	1.12058	0.0668198	4.0826	0.445843	0.109206
AUS20	1	25.4051	35.716	4	4.2878	5.4278	17.5972	7.566		74.8367	3.61194	0.0482643	17.5972	1.08533	0.0616765	7.566	0.600909	0.0794222
AUS21	1	28.3327	34.7	4.5031	3.1489	5.2302	17.99	6.095		75.9149	0.661552	0.00871438	17.99	1.50292	0.0835421	6.095	0.289943	0.0475706
AUS22	1	23.7566	30.2351	3.5636	6.5932	4.5546	26.0719	5.225		68.7031	3.97909	0.0579171	26.0719	1.07183	0.0411105	5.225	0.0638433	0.0122188
AUS23	1	27.098	33.0974	6	3.94	4.1568	19.1411	6.5658		74.2922	3.58566	0.0482643	19.1411	1.10673	0.0578195	6.5658	0.423068	0.0644351
AUS24	1	28.1525	41.3833	4.5318	2.5176	3.0875	15.1937	5.1336		79.6727	2.19861	0.0275955	15.1937	0.370835	0.0244071	5.1336	0.207945	0.0405066
AUS25	1	30.8769	30.329	4.4882	4.6586	5.5976	16.3924	7.6572		75.9503	4.4718	0.058878	16.3924	1.79156	0.109292	7.6572	0.248524	0.0324562
AUS26	1	28.4638	30.386	4.7001	4.0577	5.3479	18.493	8.5515		72.9555	12.1414	0.166422	18.493	1.80678	0.0977006	8.5515	1.57169	0.183791
AUS27	1	32.45	36.8501	5.3579	4.6207	4.3446	10.53	5.8494		83.6233	3.55768	0.0425441	10.53	0.459958	0.0436807	5.8494	0.11391	0.0194737
AUS28	1	36.5158	13.3702	10.3809	2.45297	5.82579	22.3833	9.07096		68.5457	0.413539	0.00603304	22.3833	0.172512	0.00770718	9.07096	0.161059	0.0177555
AUS29	1	28.12	36.7888	5.582	4.7881	5.7785	11.84	7.1034		81.0574	1.85466	0.0228808	11.84	0.973904	0.0822554	7.1	0.650651	0.091641
AUS30	1	31.7445	31.9436	4.1996	4.257	3.3635	17.9129	6.579		75.5082	0.124853	0.0016535	17.9129	0.851512	0.0475362	6.579	0.046474	0.007064
AUS31	1	30.6548	35.1962	4.8951	3.2828	5.6477	15.2801	5.0432		79.6766	0.672968	0.00844625	15.2801	0.176651	0.0115608	5.0432	0.116985	0.0231966
AUS32	1	22.7029	42.6517	4.8962	3.2792	5.2728	16.1655	5.0316		78.8028	0.718413	0.00911659	16.1655	0.70612	0.0436807	5.0316	0.261291	0.0519299
AUS33	1	26.2987	32.1319	6.223	3.7263	6.3848	17.8423	7.3931		74.7647	6.17448	0.0825855	17.8423	1.284	0.0719641	7.3931	0.856299	0.115824
AUS34	1	39.2544	22.91	7.0149	3.5347	4.5851	13.7	8.9961		77.2991	4.31113	0.0557721	13.7	1.37378	0.100276	8.9961	0.71449	0.0794222
AUS35	1	21.7819	38.2089	4.4233	4.032	3.8591	20.4506	7.2442		72.3052	3.57054	0.0493815	20.4506	1.70849	0.0835421	7.2442	0.509425	0.0703218
AUS36	1	30.36	36.716	4.57	4.4621	3.6333	14.3	5.9632		79.7414	0.395557	0.0049605	14.3	0.679768	0.0475362	5.9632	0.042124	0.007064
AUS37	1	17.0962	31.8108	12.9079	2.4226	5.75366	22.1062	7.9027		69.9911	3.40309	0.0486218	22.1062	0.965613	0.0436807	7.9027	0.547182	0.0692399
NEW01	1	14.9192	35.7123	11.1794	2.29782	5.45733	20.9676	9.46637		69.566	3.10574	0.0446445	20.9676	1.45498	0.0693918	9.46637	0.601834	0.063576
NEW02	1	16.9692	39.0565	11.6326	2.1425	5.08844	19.5503	5.56043		74.8892	0.46687	0.00623414	19.5503	0.7786	0.0398254	5.56043	0.049364	0.00887773
BEL01	2	13.086	34.6744	12.404	2.54594	6.04661	23.2317	8.01131		68.757	6.77528	0.0985396	23.2317	2.92831	0.126048	8.01131	1.12419	0.140325
BEL02	2	11.2959	37.7783	16.0247	2.14031	5.08323	19.5303	8.14734		72.3224	1.71944	0.0237746	19.5303	1.40548	0.0719641	8.14734	0.275838	0.0338563
ENG01	2	15.5487	34.9657	14.7052	2.03807	4.84042	18.5974	9.30457		72.098	6.16207	0.085468	18.5974	1.07529	0.0578195	9.30457	1.13247	0.121711
GER01	2	17.3	35.1149	11.5653	2.12935	5.05722	19.4304	9.4028		71.1668	3.74649	0.0526438	19.4304	0.773823	0.0398254	9.4028	0.704904	0.0749675
GER02	2	15.0787	36.2537	11.3505	2.27388	5.40048	20.7492	8.89357		70.3572	4.81063	0.0683744	20.7492	2.4014	0.115735	8.89357	0.865955	0.0973686
GER03	2	14.1981	31.1433	16.2638	2.53654	6.02429	23.1459	6.68799		70.1661	5.7069	0.0813343	23.1459	1.93366	0.0835421	6.68799	0.774631	0.115824
GER04	2	14.6572	39.3207	13.8615	1.93025	4.58435	17.6135	8.03254		74.3539	4.40605	0.0592578	17.6135	0.769372	0.0436807	8.03254	0.677835	0.0843861
HOL01	2	16.362	34.0037	14.8088	2.12322	5.04265	19.3744	8.2852		72.3404	1.57601	0.021786	19.3744	0.373314	0.0192684	8.2852	0.257043	0.0310243
HOL02	2	11.7864	37.8224	13.4	2.0114	4.77706	18.354	11.8455		69.7973	6.18378	0.0885962	18.354	1.43887	0.0783957	11.8455	1.49449	0.126166
POL01	2	16.872	36.1746	12.8283	2.14679	5.09863	19.5895	7.29014		73.1204	4.1663	0.0569787	19.5895	1.88868	0.0964131	7.29014	0.591526	0.0811405
POL02	2	15.9214	37.8802	11.3664	2.03805	4.84037	18.5972	9.35638		72.0464	0.386363	0.0053627	18.5972	0.38223	0.0205531	9.35638	0.0714524	0.00763675
CAN01	3	15.7653	36.8743	16.9704	1.88375	4.47391	17.1893	6.84301		75.9677	0.517727	0.0068151	17.1893	0.1104	0.00642264	6.84301	0.0664117	0.00970504
CAN02	3	13.4452	36.0903	11.0609	2.38462	5.66347	21.7596	9.59585		68.6445	0.690225	0.0100551	21.7596	0.167705	0.00770718	9.59585	0.137402	0.0143189
CAN03	3	14.8934	34.6491	10.4329	2.36346	5.61323	21.5666	10.4813		67.952	0.19435	0.00286011	21.5666	0.221624	0.0102763	10.4813	0.0426899	0.00407294
CAN04	3	16.0451	33.0063	13.5319	2.27706	5.40801	20.7781	8.95345		70.2684	0.706553	0.0100551	20.7781	2.40475	0.115735	8.95345	0.128204	0.0143189
CAN05	3	10.6729	33.5153	17.3878	3.00348	7.13327	17.4068	10.8804		71.7128	0.432646	0.00603304	17.4068	1.00645	0.0578195	10.8804	0.0934776	0.00859135
CAN06	3	13.0492	38.7625	12.3102	2.18392	5.18681	19.9283	8.57908		71.4926	0.434513	0.00607772	19.9283	0.870481	0.0436807	8.57908	0.0742518	0.00865499
CAN07	3	16.1913	37.2824	14.209	1.97814	4.69809	18.0505	7.5905		74.359	3.28981	0.0442423	18.0505	0.510133	0.0282614	7.5905	0.478226	0.0630032
CAN08	3	12.3006	37.208	11.8292	2.29825	5.45835	20.9715	9.93396		69.0945	0.2779	0.00402202	20.9715	0.107754	0.0051381	9.93396	0.0568974	0.00572756
CAN09	3	15.0036	35.7827	11.1583	2.28158	5.41876	20.8194	9.53563		69.6449	4.70591	0.06757	20.8194	1.49825	0.0719641	9.53563	0.917548	0.0962231
USA01	3	10.3079	42.1574	7.96293	2.52704	6.00173	23.0593	7.98369		68.957	1.34205	0.0194621	23.0593	1.98577	0.0861157	7.98369	0.221268	0.0277151
USA02	3	12.3403	34.6749	6.43485	2.91699	6.92785	26.6175	10.0875		63.2949	3.32219	0.0524874	26.6175	2.97767	0.111869	10.0875	0.75399	0.0747447
USA03	3	14.0938	34.8999	11.3435	2.39843	5.69626	21.8856	9.68256		68.4318	6.02763	0.0880823	21.8856	1.51868	0.0693918	9.68256	1.21452	0.125434
USA04	3	17.5023	34.927	12.4634	2.23017	5.29665	20.3503	7.23023		72.4195	0.946637	0.0130716	20.3503	0.339833	0.0166992	7.23023	0.134588	0.0186146
USA05	3	15.5984	37.6362	11.4541	2.16464	5.14101	19.7523	8.2533		71.9944	1.78081	0.0247354	19.7523	0.68512	0.0346856	8.2533	0.290719	0.0352245
USA06	3	17.8778	38.5592	13.7315	1.83087	4.34833	16.7067	6.94566		76.3476	12.2044	0.159853	16.7067	1.56773	0.0938383	6.94566	1.5811	0.227639
USA07	3	15.0375	36.851	11.404	2.16173	5.13411	19.7258	9.68593		70.5883	4.6135	0.0653579	19.7258	1.14053	0.0578195	9.68593	0.901498	0.0930729
USA08	3	15.4196	34.4457	12.3205	2.32008	5.51019	21.1707	8.81314		70.0161	2.75818	0.0393935	21.1707	1.11522	0.0526775	8.81314	0.494402	0.0560983
USA09	3	20.6204	39.9101	14.2772	1.60543	3.8129	14.6495	5.12441		80.226	4.04056	0.0503647	14.6495	1.84655	0.126048	5.12441	0.367532	0.0717218
USA10	3	16.8819	36.7358	14.0432	2.05514	4.88095	18.7531	6.64995		74.5969	4.8755	0.0653579	18.7531	1.56667	0.0835421	6.64995	0.618931	0.0930729
USA11	3	15.9166	39.3677	11.5925	2.04808	4.8642	18.6888	7.52215		73.7891	0.708978	0.00960817	18.6888	1.03252	0.0552484	7.52215	0.102922	0.0136825
USA12	3	17.6352	37.8612	13.7909	1.88326	4.47273	17.1847	7.17212		75.6432	1.32175	0.0174735	17.1847	0.507742	0.0295462	7.17212	0.178464	0.0248831
USA13	3	15.2991	36.3633	14.0823	2.19662	5.21697	20.0442	6.79758		73.1583	4.11942	0.0563083	20.0442	1.15894	0.0578195	6.79758	0.54507	0.0801859
USA14	3	12.6135	38.7496	12.3076	2.40528	5.71253	21.9482	6.2633		71.7885	0.786001	0.0109488	21.9482	0.281933	0.0128454	6.2633	0.145487	0.0232285
USA15	3	15.5246	39.1983	14.3949	1.99831	4.74598	18.2345	5.90335		75.8621	2.24771	0.0296289	18.2345	0.796497	0.0436807	5.90335	0.204374	0.0346199
USA16	3	12.2734	36.2265	8.689	2.75091	6.53341	25.1021	8.42478		66.4732	1.41402	0.021272	25.1021	1.80645	0.0719641	8.42478	0.255207	0.0302925
USA17	3	15.4333	37.007	14.6771	2.11189	5.01574	19.271	6.48402		74.245	9.08287	0.122337	19.271	1.80836	0.0938383	6.48402	1.1296	0.174213
USA18	3	26.44	35.4132	6.72728	1.77124	4.2067	16.1626	9.28079		74.5584	3.51854	0.0471917	16.1626	0.664451	0.0411105	9.28079	0.406351	0.0437841
USA19	3	13.9861	33.8514	11.9516	2.41947	5.74624	22.0776	9.96747		67.9549	0.877648	0.0129152	22.0776	0.482126	0.0218378	9.96747	0.124011	0.0124415
USA20	3	15.9112	35.6576	14.4628	2.13899	5.08009	19.5183	7.2311		73.2506	10.9253	0.14915	19.5183	1.88182	0.0964131	7.2311	0.931874	0.12887
USA21	3	16.7891	30.6983	13.4624	2.59226	6.15662	23.6544	6.64689		69.6987	0.803612	0.0115298	23.6544	1.30687	0.0552484	6.64689	0.309217	0.0465206
USA22	3	17.3221	34.5255	13.5655	2.12419	5.04494	19.3832	8.03453		72.5823	2.49922	0.034433	19.3832	0.572699	0.0295462	8.03453	0.329286	0.0409839
USA23	3	17.8866	38.2187	14.7075	1.83915	4.36798	16.7823	6.19789		77.0199	2.75012	0.0357066	16.7823	1.01349	0.0603908	6.19789	0.31515	0.050848
USA24	3	17.1555	35.2856	15.168	2.04543	4.85789	18.6645	6.82313		74.5123	5.84396	0.0784295	18.6645	1.55927	0.0835421	6.82313	0.762058	0.111688
USA25	3	16.7187	34.7389	16.9072	2.04281	4.85167	18.6406	6.1001		75.2593	1.00562	0.0133621	18.6406	0.311283	0.0166992	6.1001	0.116074	0.0190282
USA26	3	14.0245	37.015	13.6672	2.18746	5.19521	19.9606	7.95009		72.0894	1.81699	0.0252047	19.9606	0.615403	0.030831	7.95009	0.28535	0.0358927
USA27	3	15.1726	34.259	12.5071	2.67467	6.35234	24.4064	4.62797		70.9657	0.309211	0.00435719	24.4064	0.0940517	0.00385357	4.62797	0.0287159	0.00620486
USA28	3	14.9692	40.3967	14.8867	1.87279	4.44787	17.0892	6.33751		76.5733	0.111215	0.0014524	17.0892	0.109758	0.00642264	6.33751	0.0131078	0.00206829
USA29	3	18.3937	38.493	14.9199	1.91322	4.5439	17.4581	4.27823		78.2636	2.2664	0.0289586	17.4581	1.21145	0.0693918	4.27823	0.176428	0.0412385
USA30	3	19.0018	37.4423	14.7616	1.91258	4.54239	17.4523	4.88695		77.6607	0.177	0.00227915	17.4523	0.76233	0.0436807	4.88695	0.0158612	0.00324562
USA31	3	13.1489	38.19	14.2474	2.12211	5.04002	19.3643	7.88729		72.7484	3.09501	0.0425441	19.3643	1.39353	0.0719641	7.88729	0.477851	0.0605849
USA32	3	12.9105	36.9032	9.45132	2.56939	6.1023	23.4457	8.61765		67.9367	1.13548	0.0167137	23.4457	1.02412	0.0436807	8.61765	0.205111	0.0238012
USA33	3	15.4194	37.9671	15.6858	1.98983	4.72584	18.1572	6.05483		75.788	0.365785	0.00482643	18.1572	1.25996	0.0693918	6.05483	0.0416153	0.00687308
USA34	3	14.2744	38.0652	12.9363	2.16619	5.1447	19.7665	7.6467		72.5868	4.17807	0.0575596	19.7665	1.1683	0.0591051	7.6467	0.626783	0.0819678
CHI01	4	18.735	32.7983	12.9642	2.18566	5.19094	19.9441	8.18173		71.8741	6.1333	0.0853339	19.9441	1.46091	0.0732503	8.18173	0.994242	0.12152
CHI02	4	14.2586	37.5287	13.9511	2.06295	4.89951	18.8245	8.47466		72.7009	10.5997	0.145798	18.8245	1.81492	0.0964131	8.47466	1.75954	0.207624
CHI03	4	14.0314	33.8305	10.398	2.45975	5.84191	22.4452	10.9932		66.5615	0.646971	0.00971989	22.4452	2.51092	0.111869	10.9932	0.152164	0.0138416
CHI04	4	15.575	34.8573	13.3166	2.28738	5.43253	20.8723	7.65888		71.4688	8.9205	0.124817	20.8723	2.63092	0.126048	7.65888	1.36133	0.177745
EQU01	4	14.1138	39.5153	12.8077	2.03973	4.84436	18.6126	8.06652		73.3209	5.40647	0.0737371	18.6126	1.05224	0.0565339	8.06652	0.847028	0.105005
PER01	4	15.5702	32.8012	10.5542	2.46239	5.84818	22.4693	10.2945		67.2362	3.00623	0.0447115	22.4693	0.663882	0.0295462	10.2945	0.655467	0.0636714
PER02	4	16.6979	35.4201	13.0209	2.09678	4.97986	19.1331	8.65139		72.2155	8.5393	0.118247	19.1331	1.32768	0.0693918	8.65139	1.45681	0.16839
CHI03	5	15.1418	36.4257	12.1272	2.26906	5.38903	20.7052	7.94196		71.3528	6.38377	0.0894677	20.7052	2.423	0.117024	7.94196	1.01186	0.127406
CHI04	5	17.3527	34.5996	14.1662	2.0716	4.92006	18.9034	7.98656		73.1101	0.864181	0.0118203	18.9034	0.558522	0.0295462	7.98656	0.134435	0.0168327
CHI05	5	16.8797	32.7315	13.1478	2.26063	5.36901	20.6283	8.98303		70.3887	0.270522	0.00384327	20.6283	0.0529951	0.00256905	8.98303	0.0308705	0.00343654
CHI06	5	15.7964	34.8605	15.279	2.22096	5.27479	20.2663	6.30208		73.4316	4.96177	0.06757	20.2663	1.45844	0.0719641	6.30208	1.02191	0.162154
CHI07	5	15.546	34.1614	14.0693	2.33129	5.53682	21.2731	7.08217		71.6448	9.94142	0.13876	21.2731	2.46203	0.115735	7.08217	0.466482	0.065867
JAP01	5	17.0105	39.2577	13.3116	1.95828	4.65092	17.8693	5.94155		76.1891	7.72215	0.101355	17.8693	1.92995	0.108004	5.94155	0.0317619	0.00534573
JAP02	5	16.381	35.4888	14.9107	2.05994	4.89236	18.797	7.47028		73.7327	1.7991	0.0244003	18.797	0.289748	0.0154146	7.47028	0.159736	0.0213829
FIN01	6	15.2429	34.5141	9.57662	2.56561	6.09331	23.4111	8.59625		67.9926	1.18807	0.0174735	23.4111	1.02261	0.0436807	8.59625	0.837005	0.0973686
FIN02	6	15.0754	37.0176	10.8433	2.26341	5.3756	20.6536	8.77109		70.5753	0.170313	0.00241321	20.6536	1.43319	0.0693918	8.77109	1.26597	0.144335
SWE01	6	12.4544	36.71	9.77343	2.53921	6.03062	23.1703	9.32209		67.5076	2.70311	0.0400415	23.1703	0.952541	0.0411105	9.32209	0.113905	0.0122188
SWE02	6	14.2592	37.1234	12.1937	2.22449	5.28316	20.2985	8.6177		71.0838	9.14883	0.128705	20.2985	1.66966	0.0822554	8.6177	0.596689	0.0692399
SWE03	6	14.5284	32.8494	9.43333	2.58159	6.13129	23.557	10.9189		65.524	1.84477	0.0281542	23.557	0.453908	0.0192684	10.9189	0.281425	0.025774
SWE04	6	15.7853	35.9319	11.0937	2.26821	5.387	20.6974	8.83654		70.466	1.22814	0.0174288	20.6974	1.72911	0.0835421	8.83654	0.584848	0.0661852
SWE05	6	14.0374	35.5127	10.9382	2.34453	5.56825	21.3938	10.205		68.4012	3.37775	0.0493815	21.3938	1.78728	0.0835421	10.205	1.35084	0.13237
HUN01	7	17.6466	34.2808	12.3777	2.24196	5.32466	20.4579	7.67045		71.8716	0.260162	0.00361982	20.4579	0.0788361	0.00385357	7.67045	0.0109832	0.00143189
HUN02	7	13.5727	34.0725	12.0653	2.57537	6.1165	23.5002	8.09742		68.4024	1.66292	0.0243109	23.5002	1.02651	0.0436807	8.09742	0.569425	0.0703218
HUN03	7	15.0601	31.6627	10.7995	2.79296	6.63327	25.4857	7.56573		66.9485	9.574	0.143005	25.4857	3.27816	0.128627	7.56573	1.56481	0.206829
HUN04	7	16.396	34.1807	13.3547	2.26426	5.37762	20.6614	7.76531		71.5733	1.27142	0.0177639	20.6614	1.40716	0.0681058	7.76531	0.0392874	0.00505935
HUN05	7	13.5981	35.8365	15.91	2.51427	5.97138	16.2	9.96931		73.8303	10.5086	0.142335	16.2	2.04198	0.126048	9.96931	1.05698	0.106024
HUN06	7	13.3702	36.5158	10.3809	2.45297	5.82579	22.3833	9.07096		68.5457	7.56623	0.110382	22.3833	2.18686	0.0977006	9.07096	2.19364	0.241831
HUN07	7	13.8615	35.9281	12.428	2.33554	5.54691	21.3118	8.58814		70.1001	0.25375	0.00361982	21.3118	1.47886	0.0693918	8.58814	0.782107	0.0910683
HUN08	7	14.9761	34.4024	10.5761	2.41909	5.74533	22.0742	9.80678		68.119	1.65603	0.0243109	22.0742	0.90748	0.0411105	9.80678	0.978588	0.0997869
HUN09	7	13.8868	35.0103	11.0258	2.49771	5.93205	22.7916	8.85581		68.3526	1.61284	0.0235959	22.7916	0.351322	0.0154146	8.85581	0.256993	0.0290197
HUN10	7	17.5805	44.8336	4.70004	3.38864	5.8143	17.3161	6.36681		76.3171	4.76624	0.0624531	17.3161	1.44663	0.0835421	6.36681	0.711093	0.111688
HUN11	7	17.8112	44.281	6.37476	3.16453	5.42595	17.7073	5.23523		77.0574	3.08894	0.0400862	17.7073	1.77562	0.100276	5.23523	0.415794	0.0794222
HUN12	7	12.5189	36.1987	10.8379	2.46817	5.86191	22.5221	9.59234		67.8856	7.61774	0.112214	22.5221	2.69367	0.119601	9.59234	0.340633	0.0355109
HUN13	7	13.7174	37.0339	11.8725	2.23172	5.30033	20.3644	9.47968		70.1559	1.22587	0.0174735	20.3644	0.601691	0.0295462	9.47968	0.450954	0.0475706
HUN14	7	13.0395	35.9262	10.4182	2.47248	5.87213	22.5614	9.71013		67.7285	3.81368	0.0563083	22.5614	1.30449	0.0578195	9.71013	1.0845	0.111688
HUN15	7	21.5389	30.06	3.43248	6.5985	18.2884	14.1	5.98529		79.9182	2.10003	0.0262772	14.1	1.77728	0.126048	5.98529	1.73577	0.290006
HUN16	7	18.4912	41.9095	6.01443	3.06486	6.60243	20.5712	3.34634		76.0825	9.83467	0.129263	20.5712	2.35429	0.114446	3.34634	0.217965	0.0651351
HUN17	7	17.0518	43.8024	5.89865	2.80899	6.20921	20.1336	4.09534		75.7711	10.0365	0.132459	20.1336	1.96706	0.0977006	4.09534	0.44567	0.108824
HUN18	7	18.5644	41.772	6.31439	3.28653	6.68653	19.6491	3.72697		76.6239	8.91676	0.116371	19.6491	1.41403	0.0719641	3.72697	0.65083	0.174627
HUN19	7	21.3049	22.49	4.41546	6.07391	17.4163	23.29	5.00768		71.7006	2.32628	0.0324443	23.29	1.31668	0.0565339	5.00768	0.623989	0.124606
HUN20	7	17.1489	41.9461	7.30941	2.79775	3.37299	23.5828	3.84216		72.5751	2.94331	0.0405554	23.5828	0.999806	0.0423956	3.84216	0.30662	0.0798041
HUN21	7	17.0944	29.02	6.24367	3.65436	13.3158	16.2652	4.41		69.3282	5.62327	0.0811108	16.2652	1.14959	0.0706779	4.41	0.432202	0.098005
HUN22	7	21.6036	24.47	5.82761	6.06171	18.1069	18.11	5.81816		76.0698	9.98432	0.131252	18.11	1.53625	0.0848289	5.81816	0.537625	0.0924047
HUN23	7	17.7633	25.32	9.32692	3.98518	19.9871	18.19	5.43		76.3825	1.82279	0.023864	18.19	2.08177	0.114446	5.43	0.507459	0.0934548
HUN24	7	18.0838	41.993	6.21171	3.18628	6.03195	19.8616	4.63166		75.5067	0.10123	0.00134067	19.8616	0.306159	0.0154146	4.63166	0.0972699	0.0210011
HUN25	7	20.6643	30.76	7.00595	5.77153	10.4272	18.3577	7.01648		74.629	0.283484	0.00379858	18.3577	0.117905	0.00642264	7.01648	0.0736768	0.0105005
HUN26	7	22.76	43.239	5.69137	3.2321	5.81856	14.7	4.56103		80.741	3.61907	0.0448232	14.7	0.642106	0.0436807	4.56103	0.439166	0.0962867
HUN27	7	18.7717	43.2437	5.23726	3.22416	6.52052	19.0422	3.96043		76.9974	7.7146	0.100193	19.0422	1.44384	0.0758228	3.96043	0.0892222	0.0225284
HUN28	7	11.6315	40.1334	4.88327	2.64955	6.29269	24.1772	10.2325		65.5904	1.55939	0.0237746	24.1772	2.36212	0.0977006	10.2325	0.123726	0.0120915
HUN29	7	12.6742	7.369	34.2175	2.96577	7.04371	27.0627	8.66719		64.2701	3.41215	0.0530907	27.0627	1.52996	0.0565339	8.66719	0.412579	0.0476024
HUN30	7	16.287	49.5158	4.60915	6.26748	9.92242	10.0816	3.3166		86.6018	2.29888	0.0265454	10.0816	1.28376	0.127338	3.3166	0.616421	0.185859
HUN31	7	19.9324	30	5.48649	19.5607	2.92537	15.82	6.27		77.905	5.08997	0.0653355	15.82	1.74938	0.11058	6.27	1.304	0.207974
HUN32	7	19.4032	45.3702	5.92523	2.42127	6.61402	15.0195	5.24656		79.734	4.32934	0.0542973	15.0195	1.04223	0.0693918	5.24656	0.12621	0.0240558
HUN33	7	18.4971	47.1907	4.64321	3.28107	6.86526	16.6293	2.8933		80.4774	9.67809	0.120258	16.6293	1.47485	0.0886896	2.8933	0.343031	0.118561
HUN34	7	19.7635	35.63	3.18615	4.15993	4.41	17.19	5.6651		67.1496	5.18548	0.0772228	17.19	1.41397	0.0822554	5.6651	0.138441	0.0244376
HUN35	7	17.4527	35.27	5.57156	6.11276	15.704	14.3798	5.51		80.1111	0.576395	0.00719495	14.3798	0.258603	0.0179838	5.51	0.0834557	0.0151462
HUN36	7	21.6023	37.5259	4.96506	3.2671	5.75443	20.0435	6.84166		73.1148	3.96994	0.0542973	20.0435	1.39085	0.0693918	6.84166	0.529012	0.0773221
HUN37	7	18.558	30.3	6.41997	7.61719	16.7648	14.7405	5.6		79.66	2.09324	0.0262772	14.7405	0.227219	0.0154146	5.6	0.166787	0.0297833
HUN38	7	23.7875	35.45	7.277	7.51827	6.61988	12.77	6.57702		80.6526	5.4533	0.0676147	12.77	0.557802	0.0436807	6.57702	0.384237	0.0584212
HUN39	7	18.1888	43.1174	9.70959	4.18538	5.54204	14.8387	4.41808		80.7432	6.17027	0.0764184	14.8387	0.857969	0.0578195	4.41808	0.113872	0.025774
HUN40	7	18.4692	35	5.61155	5.69942	16.1605	15.0981	3.96		80.9407	7.8999	0.0976011	15.0981	1.51397	0.100276	3.96	0.638853	0.161326
SOU01	8	11.9938	38.5077	10.3143	2.30668	5.47837	21.0485	10.3505		68.601	3.64207	0.0530907	21.0485	1.46059	0.0693918	10.3505	0.995961	0.0962231
SOU02	8	15.8368	38.6304	13.0547	2.00046	4.7511	18.2542	7.47227		74.2735	0.537714	0.00723964	18.2542	0.422082	0.0231224	7.47227	0.188311	0.0252013
SOU03	8	10.4802	33.6929	18.8742	2.94684	6.99874	16.8899	10.1172		72.9929	6.89095	0.0944058	16.8899	1.41102	0.0835421	10.1172	2.0716	0.20476
SOU04	8	14.3066	38.7362	14.3198	2.01292	4.78069	18.3679	7.47585		74.1562	5.19632	0.0700726	18.3679	1.32183	0.0719641	7.47585	1.14563	0.153244
SOU05	8	13.8012	32.0565	12.8241	2.66441	6.32797	24.3127	8.0131		67.6742	6.58693	0.097333	24.3127	3.09593	0.127338	8.0131	1.3631	0.170109
SOU06	8	16.3171	39.3265	14.6607	1.93782	4.60233	17.6826	5.47295		76.8444	11.2192	0.145999	17.6826	1.5	0.0848289	5.47295	0.793072	0.144907
SOU07	8	12.9491	32.5496	13.4374	2.61217	6.20389	23.836	8.41187		67.7521	1.16267	0.0171606	23.836	0.367422	0.0154146	8.41187	0.205566	0.0244376
UZB08	8	16.3833	34.2868	12.8176	2.22802	5.29156	20.3307	8.66215		71.0071	3.21291	0.0452478	20.3307	1.17551	0.0578195	8.66215	0.558146	0.0644351
The mean, stdev and cv values have been calculated from results of the 6 (2 x3) replicate analyses
