# Supplementary material for: Investigation of Protein and Epitope Characteristics of Oats and Its Implications for Celiac Disease
Source: Frontiers journal article supplement (doi:10.3389/fnut.2021.702352), 2021-09-29
Supplement: Table_4.xlsx [file Table_4.xlsx]

## Sheet: data
Supplementary Table 4
The individual and cumulative amounts of celiac related epitopes of the 162 oat samples
Sample code	Origin code	Protein %	Avenin %			DQ2.5-ave-1a			DQ2.5-ave-1b			DQ2.5-ave-1c			DQ2.5-ave-2	cumulative amount of celiac related epitopes
						mg/100g avenin													mg/100g sample
		mean*	mean*	stdev*	cv*	mean*	stdev*	cv*	mean*	stdev*	cv*	mean*	stdev*	cv*	mean*	mean*	stdev**	cv*	mean*	stdev***	cv*
AUS01	1	17.3042	15.9755	0.472015	0.0295462	583.557	6.83327	0.0117097	0			0			0	583.557	6.83327	0.0117097	16.132	0.476639	0.0295462
AUS02	1	10.7395	20.5297	0.316457	0.0154146	1446.43	22.8285	0.0157826	648.343	4.67778	0.00721497	131.859	1.21023	0.00917823	0	2232.91	23.3342	0.0104501	49.231	0.758876	0.0154146
AUS03	1	9.61706	19.5019	1.12759	0.0578195	667.971	124.978	0.1871	760.445	188.833	0.24832	666.239	105.734	0.158703	0	2126.38	249.914	0.11753	39.8805	2.30587	0.0578195
AUS04	1	10.2697	17.8281	1.53528	0.0861157	111.849	17.8045	0.159184	24.188	1.30593	0.0539909	0	0		0	136.037	17.8523	0.131232	2.49068	0.2145	0.0861211
AUS05	1	10.8201	8.86	0.136573	0.0154146	2435.13	55.7894	0.0229103	681.605	8.52036	0.0125004	650.623	2.51554	0.00386635	0	3798.34	56.4923	0.0148729	36.413	0.561292	0.0154146
AUS06	1	10.4703	15.6525	1.52926	0.0977006	1977.28	197.642	0.0999566	640.468	32.0983	0.0501169	611.355	35.5374	0.0581288	0	3258.22	203.361	0.0624148	53.398	5.21702	0.0977006
AUS07	1	12.4811	17.3976	0.402275	0.0231224	820.222	23.1762	0.028256	576.047	5.60498	0.00973008	40.0117	2.76577	0.0691241	0	1438.19	24.0042	0.0166906	31.229	0.722091	0.0231224
AUS08	1	9.62453	17.4091	2.08215	0.119601	1256.14	168.514	0.134152	1001.75	11.5409	0.0115207	1052.76	393.888	0.374148	0	3360.78	428.576	0.127523	56.3113	6.73492	0.119601
AUS09	1	12.9818	20.8313	1.20446	0.0578195	2303.9	237.524	0.103096	671.086	46.1388	0.0687525	95.559	9.26782	0.0969853	0	3075.1	242.141	0.0787424	83.1595	4.80824	0.0578195
AUS10	1	10.1699	19.0797	0.147051	0.00770718	419.418	10.5699	0.0252013	419.418	0.642375	0.00153159	400.354	0.648448	0.00161969	0	1258.25	10.6092	0.00843169	24.415	0.188171	0.00770718
AUS11	1	13.8	25.39	2.6441	0.104139	2324.16	127.793	0.0549846	137.799	19.6092	0.142302	131.536	4.82448	0.0366781	0	2599.76	129.379	0.0497657	91.0908	9.48614	0.104139
AUS12	1	10.729	21.2179	0.626908	0.0295462	2509.9	4.89837	0.00195161	1531.63	26.3599	0.0172103	1462.01	25.2555	0.0172745	0	5573.17	36.8331	0.00660901	126.872	3.74857	0.0295462
AUS13	1	10.9888	21.124	1.22138	0.0578195	766.315	71.6889	0.0935502	313.878	2.439	0.00777055	299.611	7.86617	0.0262546	0	1394.07	72.1604	0.0517624	32.3603	1.87106	0.0578195
AUS14	1	10.2216	27.72	0.569732	0.0205531	1272.9	33.6987	0.0264741	0			0			0	1272.9	33.6987	0.0264741	36.0667	0.741283	0.0205531
AUS15	1	10.0992	16.972	0.0436019	0.00256905	1486.64	8.32564	0.00560029	217.697	0.821295	0.00377266	207.801	1.53569	0.00739019	0	1922.04	8.50583	0.00442542	32.9443	0.0846356	0.00256905
AUS16	1	13.6259	15.7628	0.992461	0.0629622	1156.09	216.305	0.1871	375.022	9.24356	0.024648	357.976	0.916472	0.00256015	0	1906.13	216.504	0.113583	40.9403	2.5777	0.0629623
AUS17	1	10.2055	24.837	1.2445	0.0501068	130.528	4.96742	0.0380565	800.161	17.806	0.0222531	763.79	26.2851	0.034414	0	1730.85	32.1346	0.0185658	43.8725	2.19831	0.0501068
AUS18	1	11.4413	17.8202	1.51167	0.0848289	419.789	52.8962	0.126006	334.991	18.9232	0.0564885	319.764	0.551333	0.00172418	0	1089.77	56.1818	0.0515537	22.2189	1.8848	0.0848289
AUS19	1	7.52	16.7701	1.12058	0.0668198	1792.84	261.051	0.145607	428.39	7.77691	0.0181538	408.918	33.0056	0.0807145	0	2649.62	263.244	0.0993516	33.4147	2.23277	0.0668198
AUS20	1	10.1233	17.5972	1.08533	0.0616765	1102.77	116.779	0.105896	53.2895	5.83325	0.109463	0	0		0	1156.06	116.925	0.101141	20.5941	1.27018	0.0616765
AUS21	1	11.1469	17.99	1.50292	0.0835421	903.76	57.3232	0.0634275	872.96	10.2242	0.0117121	540.54	7.34295	0.0135845	0	2343	58.6891	0.0250487	46.9847	3.9252	0.0835421
AUS22	1	12.7958	26.0719	1.07183	0.0411105	289.916	4.72323	0.0162917	158.508	16.7082	0.105409	98.4322	11.8492	0.120379	0	551.544	21.0209	0.0381128	18.4	0.756436	0.0411105
AUS23	1	10.8131	19.1411	1.10673	0.0578195	1452.27	124.77	0.0859135	645.681	27.9223	0.0432448	144.149	8.35998	0.0579953	0	2248.97	128.129	0.0569724	46.5479	2.69138	0.0578195
AUS24	1	9.8465	15.1937	0.370835	0.0244071	497.779	26.8844	0.0540088	178.382	4.68626	0.026271	151.143	1.21909	0.00806578	0	834.501	27.317	0.0327346	12.4845	0.304712	0.0244072
AUS25	1	9.06508	16.3924	1.79156	0.109292	1488.2	64.402	0.0432749	540.137	5.34276	0.0098915	0	0		0	2028.34	64.6232	0.0318601	30.1408	3.29415	0.109292
AUS26	1	10.2404	18.493	1.80678	0.0977006	2665.1	653.097	0.245055	268.319	80.0205	0.298229	194.16	97.593	0.502643	0	3136.83	665.179	0.0212055	59.4039	5.8038	0.0977007
AUS27	1	12.8794	10.53	0.459958	0.0436807	618.292	5.35131	0.00865499	448.166	19.7532	0.0440757	196.308	13.2904	0.0677018	0	1272.11	24.4021	0.0191823	17.2525	0.753599	0.0436807
AUS28	1	11.4219	22.3833	0.172512	0.00770718	1948.33	40.1731	0.0206192	496.324	0.754574	0.00152032	60.1837	0.45988	0.00764127	0	2507.71	40.1829	0.0160237	64.112	0.494123	0.00770718
AUS29	1	10.5228	17.9129	0.973904	0.0822554	2523.98	328.96	0.130334	793.377	9.14918	0.0115319	271.43	13.3119	0.0490435	0	3601.71	329.356	0.0914444	67.8899	3.6911	0.0543689
AUS30	1	10.0715	11.84	0.851512	0.0475362	2227.47	227.281	0.102036	768.641	3.30954	0.00430571	711.673	2.14012	0.00300716	0	3741.67	227.315	0.0607522	44.6181	3.20885	0.0719182
AUS31	1	9.26628	15.2801	0.176651	0.0115608	2180.34	26.6411	0.0122188	754.524	8.02985	0.0106423	148.478	1.83275	0.0123436	0	3090.41	27.8852	0.00902315	43.757	0.505868	0.0115608
AUS32	1	11.6402	16.1655	0.70612	0.0436807	1491.39	73.145	0.0490449	434.942	4.99613	0.0114869	98.6598	1.31447	0.0133232	0	2029.69	73.3272	0.0361273	38.1924	1.66827	0.0436807
AUS33	1	10.5228	17.8423	1.284	0.0719641	560.332	7.98768	0.0142553	439.799	100.682	0.228927	419.808	111.469	0.265524	0	1439.93	150.42	0.104463	27.0348	1.94553	0.0719641
AUS34	1	10.0005	13.7	1.37378	0.100276	2557.33	541.624	0.211793	768.763	58.8251	0.0765193	190.164	22.3884	0.117732	0	3525.31	545.269	0.154672	48.299	4.84323	0.100276
AUS35	1	11.1852	20.4506	1.70849	0.0835421	1009.8	103.036	0.102036	75.972	4.09676	0.0539246	72.5187	3.7216	0.0513191	0	1161.75	103.184	0.0888182	26.5742	2.22006	0.0835421
AUS36	1	10.6328	14.3	0.679768	0.0475362	2260.88	31.9416	0.014128	203.842	1.86862	0.009167	0	0		0	2464.72	31.9963	0.0129817	37.4757	1.78145	0.0475362
AUS37	1	12.562	22.1062	0.965613	0.0436807	3255.67	84.5334	0.025965	1582.6	120.655	0.076239	1167.31	11.0595	0.0094743	0	6061.17	147.736	0.0243742	168.317	7.3522	0.0436807
NEW01	1	19.3744	20.9676	1.45498	0.0693918	2571.49	547.896	0.213065	342.987	33.4424	0.0975035	327.396	37.0255	0.113091	0	3257.47	550.163	0.168893	132.33	9.18263	0.0693919
NEW02	1	12.7	19.5503	0.7786	0.0398254	721.321	42.6913	0.0591848	642.4	7.28875	0.0113461	613.2	8.06969	0.01316	0	2006.12	44.0544	0.02196	49.8098	1.9837	0.0398254
BEL01	2	13.5905	23.2317	2.92831	0.126048	1141.45	213.566	0.1871	486.626	87.2726	0.179342	284.858	59.2539	0.208012	0	1926.5	238.197	0.123643	60.8255	7.66693	0.126048
BEL02	2	18.2846	19.5303	1.40548	0.0719641	1044.48	47.1496	0.0451417	757.226	17.1386	0.0226334	722.807	18.9749	0.0262517	0	2558.93	53.6364	0.0209605	91.3803	6.5761	0.0719641
ENG01	2	13.7708	18.5974	1.07529	0.0578195	1105.9	179.467	0.162281	416.511	14.9513	0.0358966	812.231	33.8173	0.0416351	0	2373.32	183.236	0.0772067	60.7811	3.51434	0.0578195
GER01	2	18.7515	19.4304	0.773823	0.0398254	571.214	57.0966	0.0999566	571.214	51.361	0.0899156	0	0		0	1142.43	76.7983	0.0672238	41.6241	1.6577	0.0398255
GER02	2	14.1746	20.7492	2.4014	0.115735	1111.99	144.364	0.129825	344.052	49.4012	0.143586	132.611	22.0852	0.16654	0	1594.97	154.173	0.0966619	46.9099	5.4291	0.115735
GER03	2	16.078	23.1459	1.93366	0.0835421	2629.21	406.035	0.154432	1191.07	43.4001	0.0364377	1136.94	48.0501	0.0422628	0	5011.36	411.165	0.0820466	186.493	15.58	0.0835421
GER04	2	15.1362	17.6135	0.769372	0.0436807	3332.64	374.971	0.112515	1035.92	8.59408	0.00829609	988.832	9.51487	0.00962234	0	5404.48	375.191	0.0694222	144.084	6.29369	0.0436807
HOL01	2	20.1192	19.3744	0.373314	0.0192684	2067.74	85.5335	0.0413657	943.101	3.45179	0.00366004	900.233	3.82162	0.00424515	0	3953.94	85.6883	0.0216716	154.123	2.96971	0.0192684
HOL02	2	14.0779	18.354	1.43887	0.0783957	953.119	160.334	0.168221	252.326	5.00754	0.0198456	240.856	5.54406	0.0230181	0	1457.77	160.508	0.110105	37.6668	2.95291	0.0783957
POL01	2	20.434	19.5895	1.88868	0.0964131	1676.05	181.327	0.108187	615.266	88.3438	0.143586	60.2733	10.0379	0.16654	0	2354.46	201.953	0.0857746	94.2468	9.08663	0.0964131
POL02	2	14.7534	18.5972	0.38223	0.0205531	3557.91	36.2279	0.0101823	1063.65	7.18707	0.006757	521.636	4.08817	0.0078372	0	5168.04	37.1595	0.00719025	141.797	2.91436	0.0205531
CAN01	3	15.8419	17.1893	0.1104	0.00642264	681.536	8.81912	0.0129401	681.536	7.02284	0.0103044	622.957	7.44541	0.0119517	0	2015.69	13.5104	0.00670261	54.8896	0.352536	0.00642264
CAN02	3	16.627	21.7596	0.167705	0.00770718	1250.33	23.8712	0.0190919	1110.99	4.06628	0.00366004	840.591	3.56844	0.00424515	0	3241.95	24.4766	0.00754997	117.292	0.903994	0.00770718
CAN03	3	13.5607	21.5666	0.221624	0.0102763	199.549	1.08366	0.00543058	199.549	0.431472	0.00216224	190.478	0.477701	0.0025079	0	598.646	1.26043	0.00210548	17.5079	0.179916	0.0102763
CAN04	3	15.0544	20.7781	2.40475	0.115735	1357.34	25.9142	0.0190919	819.706	16.847	0.0205525	764.248	18.2183	0.0238381	0	2977.69	35.8786	0.0120491	93.1426	10.7798	0.115735
CAN05	3	21.2601	17.4068	1.00645	0.0578195	3073.69	35.2095	0.0114551	582.556	4.42837	0.00760162	556.076	4.90284	0.00881685	0	4238.8	35.824	0.00845144	156.865	9.06987	0.0578195
CAN06	3	19.6011	19.9283	0.870481	0.0436807	2332.84	26.921	0.01154	780.639	5.4467	0.00697723	745.156	6.03027	0.00809263	0	3894.12	28.1206	0.0072213	152.111	6.6443	0.0436807
CAN07	3	22.0701	18.0505	0.510133	0.0282614	269.994	22.6807	0.0840043	269.994	32.7775	0.121401	257.722	36.2894	0.140808	0	809.983	53.9045	0.0665502	32.2679	0.91194	0.0282615
CAN08	3	10.9424	20.9715	0.107754	0.0051381	1701.63	12.9949	0.00763675	244.084	1.78671	0.00732008	53.9101	0.457713	0.0084903	0	2002.19	13.1252	0.0065554	45.9462	0.236076	0.00513811
CAN09	3	10.7604	20.8194	1.49825	0.0719641	1663.24	213.39	0.128297	503.858	40.991	0.0813543	480.956	45.3829	0.0943599	0	2670.96	221.98	0.0831087	59.8361	4.30605	0.0719641
US01	3	16.7611	23.0593	1.98577	0.0861157	2064.95	76.3071	0.0369534	262.807	3.29392	0.0125336	250.861	3.64684	0.0145373	0	2590.57	76.4652	0.0295168	100.125	8.62235	0.0861157
US02	3	11.8101	26.6175	2.97767	0.111869	2743.96	273.462	0.0996596	917.621	60.6861	0.0661341	875.911	67.1882	0.0767066	0	4579.21	288.06	0.0629062	143.95	16.1035	0.111869
US03	3	13.2343	21.8856	1.51868	0.0693918	1424.6	238.257	0.167245	234.222	5.77663	0.024663	223.576	6.39556	0.0286058	0	1893.04	238.413	0.125941	54.8304	3.80479	0.0693919
US04	3	19.9825	20.3503	0.339833	0.0166992	1718.99	42.6644	0.0248194	1370.7	17.0572	0.0124441	1064.28	15.3613	0.0144335	0	4204.65	48.4476	0.0115224	170.982	2.85527	0.0166992
US05	3	15.0166	19.7523	0.68512	0.0346856	1513.67	71.0912	0.046966	925.378	35.8909	0.0387852	883.315	39.7364	0.0449855	0	3364.43	89.0005	0.0264534	99.7934	3.46139	0.0346856
US06	3	15.0832	16.7067	1.56773	0.0938383	684.635	207.799	0.303519	684.635	223.697	0.32674	653.515	247.665	0.378974	0	2053.9	393.14	0.191411	51.7564	4.85674	0.0938384
US07	3	13.3956	19.7258	1.14053	0.0578195	1057.86	131.277	0.124097	235.699	13.8027	0.0585607	147.42	10.0131	0.0679224	0	1448	132.38	0.0914229	38.2615	2.21226	0.0578195
US08	3	17.77	21.1707	1.11522	0.0526775	1164.17	87.0771	0.0747978	375.177	37.2444	0.0992716	358.123	41.2349	0.115142	0	1914.52	103.295	0.0539535	72.0249	3.7941	0.0526775
US09	3	22.8239	14.6495	1.84655	0.126048	1409.99	134.836	0.0956291	1241.32	40.2622	0.0324348	690.596	25.9802	0.03762	0	3374.8	143.097	0.0424017	112.84	14.2232	0.126048
US10	3	18.6471	18.7531	1.56667	0.0835421	1213.82	150.632	0.124097	688.518	56.7001	0.0823509	657.222	62.7751	0.0955159	0	2590.85	172.758	0.0666801	90.5999	7.5689	0.0835421
US11	3	16.2554	18.6888	1.03252	0.0552484	1741.97	31.7795	0.0182434	1450.93	25.7626	0.0177559	1384.98	28.5229	0.0205944	0	4643.84	49.8719	0.0107394	141.076	7.79425	0.0552484
US12	3	15.4731	17.1847	0.507742	0.0295462	1385.66	45.9727	0.0331775	931.298	8.65723	0.00929588	888.966	9.58479	0.010782	0	3248.26	47.7525	0.014701	86.3714	2.55194	0.0295462
US13	3	22.055	20.0442	1.15894	0.0578195	1783.43	190.674	0.106915	818.222	69.6619	0.0851382	781.03	77.1257	0.0987487	0	3419.87	217.159	0.0634991	151.183	8.74135	0.0578195
US14	3	14.6181	21.9482	0.281933	0.0128454	2635.02	81.61	0.0309713	351.009	4.94996	0.0141021	297.626	4.86812	0.0163565	34.7544	3337.04	81.9048	0.0245441	107.066	1.3753	0.0128454
US15	3	18.4599	18.2345	0.796497	0.0436807	3366.52	155.398	0.0461599	1256.81	49.0051	0.0389916	1199.68	54.2556	0.045225	0	5880.14	171.737	0.0292064	197.931	8.64574	0.0436807
US16	3	18.7598	25.1021	1.80645	0.0719641	2054.97	83.0003	0.0403899	1066.43	41.2871	0.0387151	983.37	44.1575	0.0449043	0	4151.61	102.682	0.024733	195.503	14.0692	0.0719641
US17	3	20.0461	19.271	1.80836	0.0938383	2443.43	567.571	0.232285	449.723	20.0264	0.0445305	429.281	22.1721	0.0516493	0	3342.87	568.357	0.17002	129.138	12.1181	0.0938383
US18	3	17.9169	16.1626	0.664451	0.0411105	1654.78	96.604	0.0583787	546.22	17.3222	0.0317128	521.392	19.1781	0.0367826	0	2747.22	100.001	0.0364008	79.5551	3.27055	0.0411105
US19	3	19.2212	22.0776	0.482126	0.0218378	1809.96	30.0249	0.0165887	1531.08	1.66102	0.00108487	1232.66	1.55106	0.00125831	0	4632.39	30.1108	0.00650005	196.579	4.29285	0.0218378
US20	3	17.3803	19.5183	1.88182	0.0964131	1598.36	274.642	0.171827	916.373	130.117	0.141991	874.72	144.058	0.16469	0	3431.11	336.32	0.0980207	116.394	11.2219	0.0964131
US21	3	11.776	23.6544	1.30687	0.0552484	1026.78	63.6883	0.0620274	982.082	6.9751	0.00710236	718.329	5.91743	0.00823777	0	2761.39	64.3419	0.0233005	76.9199	4.2497	0.0552484
US22	3	15.4349	19.3832	0.572699	0.0295462	1499.64	81.948	0.0546452	1651.7	6.36978	0.00385649	1576.62	7.05225	0.00447301	0	4803.04	82.4972	0.017176	143.696	4.24568	0.0295462
US23	3	17.8008	16.7823	1.01349	0.0603908	1846.9	125.215	0.0677974	979.343	54.8315	0.055988	934.827	106.236	0.113642	0	3805.59	173.122	0.0454917	113.687	6.86565	0.0603908
US24	3	19.1241	18.6645	1.55927	0.0835421	2612.03	388.975	0.148917	1174.37	172.79	0.147134	1120.99	125.632	0.112072	0	4960.78	443.78	0.0894579	177.071	14.7929	0.0835421
US25	3	17.8114	18.6406	0.311283	0.0166992	3753.82	95.2381	0.025371	1573.29	51.2107	0.03255	1501.78	14.989	0.00998082	0	6900.41	109.167	0.0158204	229.105	3.82586	0.0166992
US26	3	13.0251	19.9606	0.615403	0.030831	3432.66	164.277	0.047857	777.209	2.7425	0.00352866	741.881	32.7925	0.0442018	0	4987.08	167.54	0.0335949	129.658	3.99749	0.030831
US27	3	16.5382	24.4064	0.0940517	0.00385357	839.715	6.94708	0.00827315	101.98	0.70918	0.00695408	0	0		0	941.695	6.98319	0.00741555	38.0103	0.146476	0.00385358
US28	3	18.9638	17.0892	0.109758	0.00642264	2888.12	7.96462	0.00275772	543.488	1.65766	0.00305003	272.244	0.29535	0.00108487	0	3716.82	8.14065	0.00219022	120.453	0.773625	0.00642264
US29	3	14.8078	17.4581	1.21145	0.0693918	2866.71	157.625	0.0549846	436.323	30.7796	0.0705431	416.49	0.783388	0.00188093	0	3739.35	160.604	0.0429496	96.6684	6.708	0.0693918
US30	3	14.0895	17.4523	0.76233	0.0436807	1520.79	6.58121	0.00432749	1045.71	6.53982	0.00625398	998.173	4.13743	0.00414501	0	3612.2	10.1587	0.00281234	88.8219	3.8798	0.0436807
US31	3	13.8856	19.3643	1.39353	0.0719641	2192.31	177.094	0.0807799	66.8931	3.50615	0.0524143	528.229	65.6854	0.12435	9.19893	2822.96	188.916	0.0669212	75.905	5.46243	0.0719641
US32	3	13	23.4457	1.02412	0.0436807	407.052	12.9178	0.031735	514.427	5.53711	0.0107636	491.044	22.3892	0.0455951	0	1435.91	26.4349	0.0184099	43.7655	1.91171	0.0436807
US33	3	11.4	18.1572	1.25996	0.0693918	710.185	6.50821	0.0091641	0			0			0	710.185	6.50821	0.0091641	14.7003	1.02008	0.0693918
US34	3	15.3	19.7665	1.1683	0.0591051	2484.68	271.552	0.10929	1166.69	171.108	0.146662	1113.66	176.951	0.158892	0	4818.06	366.511	0.0760703	145.711	8.61228	0.0591051
CHI01	4	13.8071	19.9441	1.46091	0.0732503	1159.23	187.825	0.162026	579.557	31.8496	0.0549551	553.213	116.518	0.21062	0	2318.34	223.314	0.096325	63.8405	4.67633	0.0732503
CHI02	4	18.71	18.8245	1.81492	0.0964131	2750.81	761.514	0.276832	1439.14	11.7501	0.00816471	1373.72	221.154	0.160989	0	5629.09	793.065	0.140887	198.26	19.1149	0.0964131
CHI03	4	15.1113	22.4452	2.51092	0.111869	2099.21	38.7419	0.0184555	1221.37	18.6146	0.0152408	1165.85	6.25632	0.0053663	0	4541.95	43.4348	0.00956304	154.052	17.2336	0.111869
CHI04	4	19.7545	20.8723	2.63092	0.126048	479.208	113.569	0.236994	111.843	35.179	0.314538	53.9142	16.3909	0.304018	0	647.532	120.018	0.185346	26.6992	3.36539	0.126048
EQU01	4	16.2919	18.6126	1.05224	0.0565339	2395.04	335.323	0.140007	1050.28	182.149	0.17343	982.698	101.19	0.102972	0	4474.81	394.79	0.088225	135.691	7.67116	0.0565339
PER01	4	17.5251	22.4693	0.663882	0.0295462	1646.94	139.817	0.0848952	163.937	2.46283	0.0150231	156.485	5.22618	0.0333974	0	1974.81	139.937	0.0708607	77.7635	2.29762	0.0295462
PER02	4	19.451	19.1331	1.32768	0.0693918	2983.61	669.881	0.224521	1325.85	373.133	0.281429	1265.59	262.447	0.207372	0	5635.31	810.461	0.143818	209.723	14.5531	0.0693918
CHI03	5	17.5706	20.7052	2.423	0.117024	1780.71	302.5	0.169875	1419.31	270.219	0.190387	1115.5	110.2	0.0987894	0	4368.65	420.319	0.0962127	158.933	18.5989	0.117024
CHI04	5	20.821	18.9034	0.558522	0.0295462	2010.49	45.1227	0.0224436	1034.2	11.6377	0.0112529	987.187	21.2217	0.0214971	0	4078.89	51.204	0.0125534	160.54	4.74334	0.0295462
CHI05	5	16.3098	20.6283	0.0529951	0.00256905	0	0		513.909	0.940143	0.00182939	490.55	2.08175	0.0042437	0	1027.82	2.28419	0.00222237	34.5802	0.0888383	0.00256905
CHI06	5	14.6611	20.2663	1.45844	0.0719641	1359.18	293.862	0.216205	0			0	0		0	1359.18	293.862	0.216205	40.3849	2.90627	0.0719642
CHI07	5	11.0113	21.2731	2.46203	0.115735	0	0		233.788	39.0581	0.167067	223.161	54.3051	0.243345	0	467.575	66.8923	0.143062	10.9527	1.26761	0.115735
JAP01	5	16.8018	17.8693	1.92995	0.108004	2378.51	16.9532	0.00712764	948.056	61.8821	0.0652726	904.962	14.894	0.0164581	0	4274.62	65.8683	0.0154091	128.34	13.8612	0.108004
JAP02	5	23.2487	18.797	0.289748	0.0154146	985.727	28.1036	0.0285105	0			0	0		0	985.727	28.1036	0.0285105	43.0767	0.664011	0.0154146
FIN01	6	18.8682	23.4111	1.02261	0.0436807	1024.09	132.952	0.129825	60.1269	1.00019	0.0166347	57.3938	1.92159	0.0334808	0	1144.34	132.97	0.116198	50.5485	2.208	0.0436808
FIN02	6	14.4324	20.6536	1.43319	0.0693918	1798.18	346.053	0.192446	0			0			0	1798.18	346.053	0.192446	53.6004	3.71943	0.0693919
SWE01	6	23.334	23.1703	0.952541	0.0411105	1915.59	31.2083	0.0162917	927.864	35.3697	0.0381195	885.689	16.1244	0.0182055	0	3771.32	49.8495	0.0132181	203.898	8.38235	0.0411105
SWE02	6	14.3911	20.2985	1.66966	0.0822554	1272.12	117.442	0.0923199	1088.87	133.415	0.122527	1039.37	78.1994	0.0752371	0	3449.86	194.184	0.0562876	100.776	8.28938	0.0822554
SWE03	6	12.9287	23.557	0.453908	0.0192684	1551.3	53.3109	0.0343654	1551.3	66.0373	0.0425691	1077.6	64.0441	0.0594321	0	4231.51	106.323	0.0251265	128.876	2.48324	0.0192684
SWE04	6	20.7244	20.6974	1.72911	0.0835421	2299.6	202.933	0.0882469	898.173	14.026	0.0156162	834.112	26.4389	0.0316971	0	4071.6	205.128	0.0503801	174.648	14.5905	0.0835421
SWE05	6	19.1937	21.3938	1.78728	0.0835421	797.839	140.814	0.176494	529.394	46.8469	0.0884917	505.33	35.658	0.0705638	0	1856.63	152.626	0.082206	76.238	6.36909	0.0835421
HUN01	7	15.5189	20.4579	0.0788361	0.00385357	799.212	1.52585	0.00190919	820.086	1.2468	0.00152032	560.803	6.52677	0.0116382	0	2206.81	6.81773	0.00308941	70.0626	0.269992	0.00385357
HUN02	7	16.944	23.5002	1.02651	0.0436807	1678.23	157.355	0.0937624	378.83	16.7617	0.0442458	142.436	9.67129	0.0678992	0	2206.28	158.54	0.0718587	87.8513	3.83741	0.0436807
HUN03	7	17.508	25.4857	3.27816	0.128627	3258.95	898.725	0.275772	1401.97	364.891	0.26027	1338.25	198.885	0.148617	0	6062.89	990.155	0.163314	270.529	34.7975	0.128627
HUN04	7	15.5198	20.6614	1.40716	0.0681058	1197.77	8.07994	0.0067458	216.116	0.322482	0.00149217	0			0	1413.89	8.08637	0.00571924	45.3378	3.08777	0.0681058
HUN05	7	15.8745	16.2	2.04198	0.126048	1417.24	200.348	0.141365	444.536	60.2359	0.135503	424.33	29.4219	0.0693374	0	2306.32	211.266	0.0916034	59.3109	7.47602	0.126048
HUN06	7	14.79	22.3833	2.18686	0.0977006	262.313	84.5804	0.322441	262.313	81.0731	0.30907	250.39	58.3437	0.233012	0	786.939	130.884	0.166321	26.0516	2.54526	0.0977009
HUN07	7	14.77	21.3118	1.47886	0.0693918	804.453	97.6802	0.121424	1491.78	8.01354	0.00537181	1423.97	10.8809	0.00764127	0	3788	98.6106	0.0260323	119.237	8.27407	0.0693918
HUN08	7	14.66	22.0742	0.90748	0.0411105	1463.17	194.673	0.133049	671.397	44.7883	0.0667091	640.879	1.51797	0.00236858	0	2805.96	199.765	0.071193	90.803	3.73296	0.0411105
HUN09	7	17.87	22.7916	0.351322	0.0154146	3267.99	126.448	0.0386929	1453.88	73.002	0.050212	1181	30.7702	0.0260543	0	5959.11	149.215	0.0250399	242.706	3.74121	0.0154146
HUN10	7	16.78	17.3161	1.44663	0.0835421	1098.96	163.653	0.148917	1495.88	141.255	0.0944291	1427.89	289.61	0.202824	0	4090.72	361.398	0.0883459	118.862	9.92996	0.0835421
HUN11	7	18.39	17.7073	1.77562	0.100276	701.516	74.288	0.105896	278.174	9.99122	0.0359172	265.529	18.3209	0.0689978	0	1257.86	77.1634	0.0613448	40.9608	4.10738	0.100276
HUN12	7	19.92	22.5221	2.69367	0.119601	711.405	33.6835	0.0473479	1223.38	46.1263	0.0377041	1147.05	409.66	0.357141	0	3136.46	413.622	0.131876	140.714	16.8296	0.119601
HUN13	7	17	20.3644	0.601691	0.0295462	575.429	36.498	0.0634275	363.617	11.5636	0.0318017	271.772	11.7209	0.0431278	11.7	1236.96	40.04	0.0323697	42.8229	1.26525	0.0295462
HUN14	7	15.47	22.5614	1.30449	0.0578195	429.821	64.0075	0.148917	429.821	52.8583	0.122977	410.284	40.515	0.0987487	0	1289.46	92.3711	0.0716353	45.0054	2.60219	0.0578195
HUN15	7	17.48	14.1	1.77728	0.126048	522.06	201.867	0.386674	1016.31	69.5419	0.0684259	970.114	26.4922	0.0273083	0	2554.68	215.147	0.0842169	62.9647	7.93658	0.126048
HUN16	7	17.33	20.5712	2.35429	0.114446	568.811	49.3995	0.0868469	1261.31	104.998	0.0832456	878.223	44.2412	0.0503758	0	2750.16	124.186	0.045156	98.0429	11.2206	0.114446
HUN17	7	16.67	20.1336	1.96706	0.0977006	1454.32	211.02	0.145098	672.341	112.212	0.166898	578.86	161.857	0.279614	0	2733.09	288.65	0.105613	91.7298	8.96206	0.0977006
HUN18	7	16.41	19.6491	1.41403	0.0719641	1223.93	284.975	0.232836	786.652	251.194	0.319321	750.895	221.351	0.294783	0	2797.23	439.666	0.157179	90.1947	6.49078	0.0719641
HUN19	7	16.59	23.29	1.31668	0.0565339	1436.67	238.691	0.166142	414.186	33.4874	0.0808513	395.359	38.7417	0.0979911	0	2265.04	244.122	0.107778	87.5169	4.94767	0.056534
HUN20	7	16.06	23.5828	0.999806	0.0423956	1423.31	151.448	0.106405	961.414	82.9718	0.0863019	883.316	26.7582	0.030293	0	3310.11	174.748	0.0527923	125.367	5.315	0.0423956
HUN21	7	17.58	16.2652	1.14959	0.0706779	544.426	71.142	0.130673	243.38	30.9535	0.127182	232.318	27.5384	0.118538	0	1031.19	82.3266	0.0798367	29.486	2.08401	0.070678
HUN22	7	15.51	18.11	1.53625	0.0848289	260.57	32.1039	0.123206	668.985	108.177	0.161703	248.726	103.901	0.417731	0	1190.13	153.389	0.128885	33.429	2.83575	0.0848289
HUN23	7	15.16	18.19	2.08177	0.114446	1024.57	127.668	0.124606	245.133	5.40526	0.0220503	233.99	16.1397	0.0689761	0	1514.84	128.798	0.0850241	41.7732	4.78077	0.114446
HUN24	7	16.1	19.8616	0.306159	0.0154146	1538.3	43.0746	0.0280014	585.688	1.20923	0.00206464	559.066	1.84997	0.00330904	0	2709.68	43.1313	0.0159175	86.6481	1.33564	0.0154146
HUN25	7	16.82	18.3577	0.117905	0.00642264	929.846	13.0185	0.0140007	1009.59	7.08712	0.00701977	854.583	5.90375	0.00690835	0	2834.72	15.955	0.00562844	87.5295	0.56217	0.00642264
HUN26	7	15.23	14.7	0.642106	0.0436807	1565.12	200.934	0.128382	814.361	90.9637	0.111699	777.344	49.7891	0.0640502	0	3193.85	226.115	0.070797	71.5041	3.12335	0.0436807
HUN27	7	16.91	19.0422	1.44384	0.0758228	806.326	24.2203	0.0300379	602.374	20.2788	0.0336649	50.0958	5.37921	0.107378	0	1461.18	32.0436	0.0219299	47.0506	3.56751	0.0758228
HUN28	7	16.45	24.1772	2.36212	0.0977006	2255.24	36.359	0.016122	702.94	2.3397	0.00332845	670.988	29.0123	0.0432381	0	3661.12	46.5743	0.0127213	145.608	14.226	0.0977006
HUN29	7	16.35	27.0627	1.52996	0.0565339	1271.97	80.7321	0.0634699	579.282	29.2783	0.0505424	408.492	47.1891	0.11552	0	2279.2	97.9883	0.0429924	100.849	5.70138	0.0565339
HUN30	7	17.92	10.0816	1.28376	0.127338	138.388	34.2943	0.247813	311.074	13.6415	0.0438529	132.098	9.90759	0.075002	0	587.85	38.2145	0.0650073	10.6202	1.35235	0.127338
HUN31	7	14.15	15.82	1.74938	0.11058	10.7059	2.96873	0.277299	46.6414	6.48474	0.139034	44.5214	0.472338	0.0106092	0	103.989	7.14761	0.0687345	2.32782	0.257416	0.110582
HUN32	7	15.09	15.0195	1.04223	0.0693918	581.4	18.648	0.0320744	581.4	12.3748	0.0212845	554.973	55.7815	0.100512	0	1744.2	60.1037	0.0344592	39.5312	2.74314	0.0693918
HUN33	7	14.68	16.6293	1.47485	0.0886896	1617.34	255.67	0.158081	454.104	27.5233	0.0606103	433.463	126.968	0.292915	0	2525.55	286.785	0.113554	61.6533	5.46801	0.0886896
HUN34	7	15.4	17.19	1.41397	0.0822554	366.973	11.9573	0.0325835	903.833	127.03	0.140546	843.643	184.072	0.218188	0	2154.62	223.969	0.103948	57.0384	4.69172	0.0822554
HUN35	7	15.86	14.3798	0.258603	0.0179838	1049.32	21.1909	0.020195	546.698	6.16768	0.0112817	521.848	6.70656	0.0128516	0	2142.71	23.0667	0.0107652	48.8674	0.878822	0.0179838
HUN36	7	16.62	20.0435	1.39085	0.0693918	1469	151.448	0.103096	654.279	43.7676	0.0668943	624.539	72.6854	0.116382	0	2777.55	173.595	0.0624992	92.5267	6.4206	0.0693918
HUN37	7	16.51	14.7405	0.227219	0.0154146	1400.89	55.6311	0.0397111	581.376	42.3477	0.0728405	554.95	42.1491	0.0759512	0	2563.65	81.6376	0.0318443	62.3905	0.961724	0.0154146
HUN38	7	14.09	12.77	0.557802	0.0436807	1193.28	92.9504	0.0778949	633.6	103.16	0.162816	375.9	9.90512	0.0263504	0	2220.68	139.212	0.0626888	39.9565	1.74533	0.0436807
HUN39	7	18.28	14.8387	0.857969	0.0578195	98.1885	3.37429	0.0343654	292.879	33.8406	0.115545	93.7254	12.5607	0.134016	0	489.256	36.2539	0.0741	13.2712	0.767335	0.0578197
HUN40	7	17.74	15.0981	1.51397	0.100276	778.253	167.404	0.215102	1381.08	260.423	0.188565	1318.3	288.326	0.21871	0	3540.41	423.055	0.119493	94.8261	9.50877	0.100276
SOU01	8	11.187	21.0485	1.46059	0.0693918	2120.34	272.035	0.128297	531.968	50.6107	0.0951385	507.788	56.0333	0.110348	0	3184.28	282.319	0.0886602	74.9801	5.20301	0.0693918
SOU02	8	17.55	18.2542	0.422082	0.0231224	1409.98	47.3776	0.0336017	859.423	7.83961	0.00912195	260.364	2.75471	0.0105802	0	2542.16	48.1008	0.0189212	81.4409	1.88311	0.0231224
SOU03	8	20.3405	16.8899	1.41102	0.0835421	2088.73	570.252	0.273014	1006.28	143.638	0.142742	960.54	159.028	0.165561	0	4101.29	609.187	0.148536	140.899	11.771	0.0835421
SOU04	8	17.509	18.3679	1.32183	0.0719641	3174.81	648.696	0.204326	1385.5	32.6208	0.0235444	1322.53	36.1159	0.0273083	0	5945.82	650.519	0.109408	191.22	13.7609	0.0719641
SOU05	8	16.9331	24.3127	3.09593	0.127338	1565.33	355.036	0.226812	438.636	40.6444	0.092661	311.293	33.456	0.107474	0	2330.09	358.917	0.154036	95.9275	12.2152	0.127338
SOU06	8	15.4	17.6826	1.5	0.0848289	1456.19	281.349	0.19321	901.809	165.896	0.183959	766.877	163.627	0.213368	0	3161.39	365.312	0.115554	86.0886	7.3028	0.0848289
SOU07	8	18.4018	23.836	0.367422	0.0154146	2753.27	89.711	0.0325835	969.703	36.3433	0.0374788	718.578	31.2368	0.0434703	0	4475.77	101.709	0.0227243	196.318	3.02616	0.0154146
UZB08	8	18.4237	20.3307	1.17551	0.0578195	1281.88	110.13	0.0859135	364.519	24.9384	0.0684146	347.95	27.6104	0.0793516	0	2010.91	116.245	0.0578072	75.3223	4.3551	0.0578195
* The mean, stdev and cv values have been calculated from results of the 6 (2 x3) replicate analyses
The stdev values have been calculated based on the the Gaussian error propagation law (59) :
**	σcum. epitope = geometrical mean of the four individual σepitope-s
***	σg epitope/100g sample = 10-4 * meanprotein * [(σavenin)2 * (meancum.epitop) +(σcum.epitop)2 * (meanavenin)2]0.5

## Sheet: Sheet1
			cv*
			0.0117097
			0.00210548
			0.00219022
			0.00222237
			0.00281234
			0.00308941
			0.00442542
			0.00562844
			0.00571924
			0.00650005
			0.0065554
			0.00660901
			0.00670261
			0.00719025
			0.0072213
			0.00741555
			0.00754997
			0.00843169
			0.00845144
			0.00902315
			0.0091641
			0.00956304
			0.0104501
			0.0107394
			0.0107652
			0.0115224
			0.0120491
			0.0125534
			0.0127213
			0.0129817
			0.0132181
			0.014701
			0.0148729
			0.0154091
			0.0158204
			0.0159175
			0.0160237
			0.0166906
			0.017176
			0.0184099
			0.0185658
			0.0189212
			0.0191823
			0.0209605
			0.0212055
			0.0216716
			0.0219299
			0.02196
			0.0227243
			0.0233005
			0.0243742
			0.0245441
			0.024733
			0.0250399
			0.0250487
			0.0251265
			0.0260323
			0.0264534
			0.0264741
			0.0285105
			0.0292064
			0.0295168
			0.0318443
			0.0318601
			0.0323697
			0.0327346
			0.0335949
			0.0344592
			0.0361273
			0.0364008
			0.0381128
			0.0424017
			0.0429496
			0.0429924
			0.045156
			0.0454917
			0.0497657
			0.0503801
			0.0515537
			0.0517624
			0.0527923
			0.0539535
			0.0562876
			0.0569724
			0.0578072
			0.0607522
			0.0613448
			0.0624148
			0.0624992
			0.0626888
			0.0629062
			0.0634991
			0.0650073
			0.0665502
			0.0666801
			0.0669212
			0.0672238
			0.0687345
			0.0694222
			0.070797
			0.0708607
			0.071193
			0.0716353
			0.0718587
			0.0741
			0.0760703
			0.0772067
			0.0787424
			0.0798367
			0.0820466
			0.082206
			0.0831087
			0.0842169
			0.0850241
			0.0857746
			0.088225
			0.0883459
			0.0886602
			0.0888182
			0.0894579
			0.0914229
			0.0914444
			0.0916034
			0.0962127
			0.096325
			0.0966619
			0.0980207
			0.0993516
			0.101141
			0.103948
			0.104463
			0.105613
			0.107778
			0.109408
			0.110105
			0.113554
			0.113583
			0.115554
			0.116198
			0.11753
			0.119493
			0.123643
			0.125941
			0.127523
			0.128885
			0.131232
			0.131876
			0.140887
			0.143062
			0.143818
			0.148536
			0.154036
			0.154672
			0.157179
			0.163314
			0.166321
			0.168893
			0.17002
			0.185346
			0.191411
			0.192446
			0.216205
			0.061636
			0.216205

## Sheet: disti
Supplemental Table 4
The individual and cumulative amounts of celiac related epitopes of the 162 oat samples
sample code
	mean*
HUN31	2.32782	1	<5	2	1.23457
AUS04	2.49068	2	6-25	12	7.40741
HUN30	10.6202	1	26-50	46	28.3951
CHI07	10.9527	2	51-75	24	14.8148
AUS24	12.4845	3	76-100	30	18.5185
HUN39	13.2712	4	101-125	9	5.55556
US33	14.7003	5	126-150	16	9.87654
AUS01	16.132	6	151-175	10	6.17284
AUS27	17.2525	7	176-200	8	4.93827
CAN03	17.5079	8	>200	5	3.08642
AUS22	18.4	9
AUS20	20.5941	10
AUS18	22.2189	11		162
AUS10	24.415	12
HUN06	26.0516	1
AUS35	26.5742	2
CHI04	26.6992	3
AUS33	27.0348	4
HUN21	29.486	5
AUS25	30.1408	6
AUS07	31.229	7
CAN07	32.2679	8
AUS13	32.3603	9
AUS15	32.9443	10
AUS19	33.4147	11
HUN22	33.429	12
CHI05	34.5802	13
AUS14	36.0667	14
AUS05	36.413	15
AUS36	37.4757	16
HOL02	37.6668	17
US27	38.0103	18
AUS32	38.1924	19
US07	38.2615	20
HUN32	39.5312	21
AUS03	39.8805	22
HUN38	39.9565	23
CHI06	40.3849	24
AUS16	40.9403	25
HUN11	40.9608	26
GER01	41.6241	27
HUN23	41.7732	28
HUN13	42.8229	29
JAP02	43.0767	30
AUS31	43.757	31
US32	43.7655	32
AUS17	43.8725	33
AUS30	44.6181	34
HUN14	45.0054	35
HUN04	45.3378	36
CAN08	45.9462	37
AUS23	46.5479	38
GER02	46.9099	39
AUS21	46.9847	40
HUN27	47.0506	41
AUS34	48.299	42
HUN35	48.8674	43
AUS02	49.231	44
NEW02	49.8098	45
FIN01	50.5485	46
US06	51.7564	1
AUS06	53.398	2
FIN02	53.6004	3
US03	54.8304	4
CAN01	54.8896	5
AUS08	56.3113	6
HUN34	57.0384	7
HUN05	59.3109	8
AUS26	59.4039	9
CAN09	59.8361	10
ENG01	60.7811	11
BEL01	60.8255	12
HUN33	61.6533	13
HUN37	62.3905	14
HUN15	62.9647	15
CHI01	63.8405	16
AUS28	64.112	17
AUS29	67.8899	18
HUN01	70.0626	19
HUN26	71.5041	20
US08	72.0249	21
SOU01	74.9801	22
UZB08	75.3223	23
US31	75.905	24
SWE05	76.238	1
US21	76.9199	2
PER01	77.7635	3
US18	79.5551	4
SOU02	81.4409	5
AUS09	83.1595	6
SOU06	86.0886	7
US12	86.3714	8
HUN24	86.6481	9
HUN19	87.5169	10
HUN25	87.5295	11
HUN02	87.8513	12
US30	88.8219	13
HUN18	90.1947	14
US10	90.5999	15
HUN08	90.803	16
AUS11	91.0908	17
BEL02	91.3803	18
HUN17	91.7298	19
HUN36	92.5267	20
CAN04	93.1426	21
POL01	94.2468	22
HUN40	94.8261	23
SOU05	95.9275	24
US29	96.6684	25
HUN16	98.0429	26
US05	99.7934	27
US01	100.125	28
SWE02	100.776	29
HUN29	100.849	30
US14	107.066	1
US09	112.84	2
US23	113.687	3
US20	116.394	4
CAN02	117.292	5
HUN10	118.862	6
HUN07	119.237	7
US28	120.453	8
HUN20	125.367	9
AUS12	126.872	1
JAP01	128.34	2
SWE03	128.876	3
US17	129.138	4
US26	129.658	5
NEW01	132.33	6
EQU01	135.691	7
HUN12	140.714	8
SOU03	140.899	9
US11	141.076	10
POL02	141.797	11
US22	143.696	12
US02	143.95	13
GER04	144.084	14
HUN28	145.608	15
US34	145.711	16
US13	151.183	1
CAN06	152.111	2
CHI03	154.052	3
HOL01	154.123	4
CAN05	156.865	5
CHI03	158.933	6
CHI04	160.54	7
AUS37	168.317	8
US04	170.982	9
SWE04	174.648	10
US24	177.071	1
GER03	186.493	2
SOU04	191.22	3
US16	195.503	4
SOU07	196.318	5
US19	196.579	6
US15	197.931	7
CHI02	198.26	8
SWE01	203.898	1
PER02	209.723	2
US25	229.105	3
HUN09	242.706	4
HUN03	270.529	5
* The mean, stdev and cv values have been calculated from results of the 6 (2 x3) replicate analyses	2.32782
The stdev values have been calculated based on the the Gaussian error propagation law (59) :	270.529
**
***
